# Supplementary material for: Water and chloride as allosteric inhibitors in WNK kinase osmosensing
Source: eLife. 2024 Nov 25;12:RP88224. doi: 10.7554/eLife.88224 (PMC11588334; doi:10.7554/eLife.88224)
Supplement: Figure 2—source data 1. [file elife-88224-fig2-data1.xlsx]

## Sheet: FAM
	Temperature	A1	A2	A3			0% PEG400		A4	A5	A6			5% PEG400		A7	A8	A9			10% PEG400		A10	A11	A12			15% PEG400		B1	B2	B3			20% PEG400
	4	1.60977	0.928957	0.728218	1.08898	-73.9944	0.0147171		0.494279	1.16104	0.966395	0.873905	-86.8811	0.0100586		2.13905	1.01742	1.52259	1.55969	-98.7563	0.0157933		0.669838	2.9726	3.23	2.29081	-135.708	0.0168804		0.748979	3.29094	3.3221	2.45401	-56.3324	0.043563
	4.5	3.48782	2.01274	1.57781	2.35946		0.031887		1.07094	2.51559	2.09385	1.89346		0.0217937		4.63461	2.20441	3.29895	3.37932		0.0342188		1.45132	6.44063	6.99832	4.96342		0.0365742		1.62279	7.13036	7.19789	5.31701		0.0943864
	5	3.21953	1.85791	1.45644	2.17796		0.0294341		0.988558	2.32208	1.93279	1.74781		0.0201173		4.2781	2.03484	3.04518	3.11938		0.0315866		1.33968	5.9452	6.45999	4.58162		0.0337608		1.49796	6.58187	6.6442	4.90801		0.0871259
	5.5	3.21953	1.85791	1.45644	2.17796		0.0294341		0.988558	2.32208	1.93279	1.74781		0.0201173		4.2781	2.03484	3.04518	3.11938		0.0315866		1.33968	5.9452	6.45999	4.58162		0.0337608		1.49796	6.58187	6.6442	4.90801		0.0871259
	6	3.21953	1.85791	1.45644	2.17796		0.0294341		0.988558	2.32208	1.93279	1.74781		0.0201173		4.2781	2.03484	3.04518	3.11938		0.0315866		1.33968	5.9452	6.45999	4.58162		0.0337608		1.49796	6.58187	6.6442	4.90801		0.0871259
	6.5	3.29782	1.7234	1.4697	2.16364		0.0292406		1.0586	2.35174	1.9965	1.80228		0.0207442		4.3368	2.00828	3.16569	3.17026		0.0321018		1.31876	5.96416	6.60612	4.62968		0.0341149		1.37296	6.68156	6.81485	4.95646		0.0879859
	7	2.78005	2.65561	1.44994	2.2952		0.0310186		0.578243	2.23907	1.51485	1.44406		0.0166211		3.97465	2.18326	2.4103	2.85607		0.0289204		1.51551	5.81718	5.6441	4.3256		0.0318742		2.2355	6.02193	5.66953	4.64232		0.0824094
	7.5	2.03886	3.67024	0.834472	2.18119		0.0294778		0.000723082	1.37201	1.35941	0.910714		0.0104823		3.2535	2.40003	0.894792	2.18277		0.0221026		1.31735	5.79769	4.17754	3.76419		0.0277374		3.23384	5.08466	4.19513	4.17121		0.0740464
	8	1.8066	3.54534	0.365943	1.90596		0.0257582		0.0722242	0.67909	1.33782	0.696379		0.00801531		2.73067	2.73269	0.722761	2.06204		0.0208801		0.855978	5.87015	3.99349	3.5732		0.02633		2.89962	4.761	3.54551	3.73538		0.0663096
	8.5	1.4539	3.46528	0.78928	1.90282		0.0257158		0.487742	0.880434	1.35348	0.907218		0.0104421		2.67999	3.29002	1.5141	2.4947		0.0252612		1.0269	5.49449	4.26448	3.59529		0.0264928		2.89906	4.33886	3.31007	3.516		0.0624152
	9	1.5135	3.81593	1.52692	2.28545		0.0308868		1.31583	1.11846	1.83043	1.42157		0.0163623		3.286	3.69505	2.41438	3.13181		0.0317125		1.51581	4.63436	4.96285	3.70434		0.0272963		3.35497	4.02716	3.46036	3.61416		0.0641578
	9.5	2.17104	3.92543	2.0603	2.71892		0.036745		2.00007	1.14229	2.11168	1.75135		0.020158		3.63442	3.90511	3.67142	3.73698		0.0378405		2.04214	4.04472	6.22882	4.10523		0.0302504		3.82353	4.05175	3.38426	3.75318		0.0666256
	10	2.3678	3.57141	2.69709	2.87877		0.0389052		2.13793	1.51044	2.14084	1.92974		0.0222113		3.6889	3.86352	4.32373	3.95872		0.0400857		2.5736	3.4876	7.27506	4.44542		0.0327572		4.4351	4.09417	3.57867	4.03598		0.0716458
	10.5	2.53354	3.6341	3.31231	3.15999		0.0427058		2.56955	2.1299	2.3031	2.33418		0.0268664		4.22928	3.62937	3.9586	3.93908		0.0398869		2.91176	2.86203	7.09078	4.28819		0.0315986		4.88575	3.74828	3.87955	4.17119		0.074046
	11	2.82013	3.91084	3.37532	3.36876		0.0455273		3.21817	2.71661	2.80002	2.9116		0.0335125		4.3505	3.41016	3.32469	3.69512		0.0374165		2.77119	2.78117	6.19861	3.91699		0.0288633		4.91171	3.71386	3.59414	4.07324		0.0723072
	11.5	2.68824	3.7104	3.16547	3.18804		0.0430849		3.55749	3.1016	3.16064	3.27324		0.037675		4.06528	3.24895	2.73537	3.34987		0.0339205		2.95378	2.82277	5.40314	3.72656		0.0274601		5.00449	4.07527	3.08375	4.05451		0.0719747
	12	2.34276	3.34904	2.93125	2.87435		0.0388455		3.64779	3.39439	3.45696	3.49971		0.0402816		4.39214	3.22911	1.99738	3.20621		0.0324659		3.19558	2.81444	4.77878	3.59627		0.0265		4.85313	4.36557	3.18688	4.13519		0.073407
	12.5	2.258	3.24874	2.60936	2.70537		0.0365618		3.61795	3.74076	3.65781	3.67218		0.0422667		4.405	3.40514	1.64197	3.1507		0.0319038		3.08817	3.39576	4.22861	3.57085		0.0263126		4.39448	4.49025	3.08209	3.98894		0.0708108
	13	2.33223	3.29074	2.61611	2.74636		0.0371158		3.31028	3.7999	3.71758	3.60926		0.0415425		3.76625	3.06982	1.96095	2.93234		0.0296927		3.3775	3.7295	3.63778	3.58159		0.0263918		4.36236	4.87605	2.99245	4.07695		0.0723731
	13.5	2.33381	3.34344	2.51738	2.73154		0.0369155		2.89082	3.68304	3.50733	3.36039		0.0386781		3.39924	2.7895	2.21998	2.80291		0.028382		3.9237	3.66634	3.14904	3.5797		0.0263779		4.40663	5.10577	3.4413	4.3179		0.0766504
	14	2.36674	3.68632	2.48872	2.84726		0.0384794		2.37986	3.27994	3.18084	2.94688		0.0339186		3.29171	3.36069	2.48628	3.04622		0.0308459		4.02222	3.8881	2.8994	3.60324		0.0265514		4.0492	4.52707	4.15345	4.24324		0.075325
	14.5	2.5996	4.20227	2.83337	3.21174		0.0434052		2.07768	2.70998	3.07253	2.62006		0.0301569		3.05942	3.45224	3.01844	3.1767		0.0321671		4.06101	3.6801	2.55353	3.43155		0.0252862		3.7537	4.08799	4.50371	4.11513		0.0730509
	15	3.17007	4.7695	3.04262	3.66073		0.0494731		2.16061	2.31616	3.16441	2.54706		0.0293166		2.92296	3.1614	3.39156	3.15864		0.0319842		4.24755	2.56765	1.92809	2.91443		0.0214757		3.35021	3.7626	4.39197	3.83493		0.0680768
	15.5	3.40173	5.21233	2.62687	3.74698		0.0506387		2.3393	2.10064	3.02464	2.48819		0.0286391		3.07364	3.63456	3.29694	3.33505		0.0337705		3.79848	1.59256	1.90557	2.4322		0.0179223		2.89958	3.0552	3.92263	3.29247		0.0584472
	16	3.39563	5.31554	2.69425	3.80181		0.0513797		2.76146	2.02882	3.38738	2.72589		0.0313749		3.67167	3.98327	3.2761	3.64368		0.0368957		3.50066	1.41737	2.31737	2.4118		0.0177719		2.97909	2.56116	3.6571	3.06578		0.0544231
	16.5	3.70085	5.36996	3.10638	4.05906		0.0548564		3.22754	2.58725	3.91067	3.24182		0.0373133		3.97363	3.14057	3.46621	3.52681		0.0357122		3.40561	0.857959	2.20407	2.15588		0.0158861		3.07448	2.87127	3.40048	3.11541		0.0553041
	17	3.81098	5.28149	3.08367	4.05871		0.0548516		3.72612	3.1223	3.82508	3.55783		0.0409506		3.64856	2.64415	3.5082	3.26697		0.0330812		2.94657	0.620442	2.10017	1.88906		0.01392		2.92705	3.10873	2.86447	2.96675		0.0526651
	17.5	3.36474	4.8591	3.52038	3.91474		0.052906		4.0874	3.04059	3.84257	3.65685		0.0420903		3.55676	2.64266	3.41404	3.20449		0.0324485		2.85935	1.19845	2.52534	2.19438		0.0161698		3.41538	3.28334	2.93185	3.21019		0.0569866
	18	3.17145	4.56186	4.33645	4.02325		0.0543724		4.09286	3.0083	4.25973	3.78697		0.0435879		3.47629	2.28153	3.37514	3.04432		0.0308266		2.78449	1.70366	1.95861	2.14892		0.0158349		3.75454	3.566	3.65268	3.65774		0.0649314
	18.5	3.33866	4.44237	4.72104	4.16736		0.0563199		3.89456	2.69733	4.32603	3.6393		0.0418883		2.81616	1.84667	3.25519	2.63934		0.0267258		2.19738	1.12053	1.16655	1.49482		0.0110149		3.32523	3.52181	3.72377	3.5236		0.0625502
	19	2.99764	4.0565	4.31868	3.79094		0.0512328		3.93208	1.94037	4.14141	3.33795		0.0384198		2.24449	2.13856	2.64108	2.34138		0.0237087		1.88961	1.32652	1.35531	1.52381		0.0112286		3.273	3.02468	2.82895	3.04221		0.0540046
	19.5	2.2927	4.22708	3.67637	3.39872		0.0459321		3.71309	1.81094	4.28992	3.27132		0.0376528		2.22923	2.57799	1.99862	2.26861		0.0229718		1.75339	1.97145	1.03718	1.58734		0.0116967		3.39088	2.43571	2.472	2.7662		0.0491049
	20	2.10126	4.71882	3.11073	3.31027		0.0447368		3.27196	2.24137	4.07427	3.19587		0.0367844		2.30019	2.35942	1.50188	2.05383		0.020797		1.19102	1.43295	0.293377	0.972447		0.00716571		3.24594	1.87869	1.77477	2.2998		0.0408256
	20.5	1.99195	4.58537	2.67754	3.08496		0.0416918		3.16601	2.4441	3.64285	3.08432		0.0355005		2.44457	2.2725	1.18272	1.9666		0.0199136		1.0757	1.05798	0.995291	1.04299		0.00768553		2.97422	1.84596	0.370902	1.73036		0.030717
	21	1.83594	4.5242	2.18552	2.84855		0.0384969		2.71362	2.84246	3.13018	2.89542		0.0333262		2.54971	2.44249	1.14575	2.04599		0.0207175		1.43664	1.08754	1.52802	1.35073		0.0099532		2.55367	1.92878	-0.0926159	1.46328		0.0259758
	21.5	2.11567	4.93085	2.43995	3.16216		0.0427351		2.12516	2.99097	2.9365	2.68421		0.0308952		2.48804	2.13003	1.46377	2.02728		0.0205281		1.61147	0.403176	0.990427	1.00169		0.0073812		1.92521	1.62265	0.482888	1.34358		0.023851
	22	2.74255	4.61956	3.11467	3.49226		0.0471963		2.13008	2.6692	3.12121	2.64016		0.0303882		2.25634	1.69735	1.62655	1.86008		0.0188351		1.93545	-0.4954	1.22618	0.888745		0.00654893		1.58076	1.62292	0.356606	1.18676		0.0210671
	22.5	3.24237	3.94845	2.98719	3.39267		0.0458504		2.25798	2.44367	3.36809	2.68991		0.0309608		1.93038	1.90822	1.58641	1.80833		0.0183111		2.31411	-0.392944	1.84077	1.25398		0.00924024		0.993378	1.8352	0.363129	1.0639		0.0188862
	23	3.34782	3.95985	2.68353	3.3304		0.0450088		2.22605	2.04588	3.55349	2.60847		0.0300235		1.2595	1.95795	1.66855	1.62866		0.0164917		2.21655	-0.287044	1.55224	1.16058		0.00855203		0.530251	1.30342	0.490182	0.774618		0.0137509
	23.5	3.23356	3.88647	2.92658	3.34887		0.0452585		2.80198	1.14366	4.02586	2.65717		0.0305839		0.839218	1.69618	1.40122	1.31221		0.0132873		2.04866	-0.232744	1.2582	1.0247		0.00755077		0.873129	0.747509	-0.430842	0.396598		0.00704033
	24	3.17181	3.40691	2.84088	3.13987		0.0424339		2.97995	0.986443	4.65726	2.87455		0.033086		0.831997	1.70051	0.896985	1.14316		0.0115756		1.96038	-0.102888	1.33982	1.06577		0.00785339		1.21985	0.933104	-1.39581	0.252382		0.00448022
	24.5	3.17311	3.27912	2.89663	3.11629		0.0421152		2.3739	1.02935	4.77552	2.72625		0.0313791		0.633642	1.68123	0.625764	0.980212		0.00992556		1.6121	-0.29068	0.943533	0.754984		0.00556328		0.843097	0.751667	-2.12821	-0.177816		-0.00315655
	25	2.8896	3.44193	3.47548	3.269		0.0441791		1.78797	0.648401	4.51796	2.31811		0.0266814		0.11085	1.09598	0.586014	0.597614		0.0060514		1.12329	-1.1407	-0.134819	-0.0507443		-0.000373921		0.348682	0.329734	-2.90299	-0.741526		-0.0131634
	25.5	2.77715	3.41512	3.5356	3.24262		0.0438226		1.31189	0.671552	4.2452	2.07622		0.0238972		-0.0531694	0.638422	0.166682	0.250645		0.00253801		0.567456	-2.12484	-1.26787	-0.941749		-0.0069395		-0.1502	-0.0259649	-3.28458	-1.15358		-0.0204781
	26	2.81107	3.1286	3.06373	3.00113		0.040559		0.792285	1.0476	3.74031	1.86007		0.0214094		-0.259897	0.468537	-0.377975	-0.0564447		-0.000571555		-0.206341	-2.59359	-1.88035	-1.56009		-0.0114959		-1.03791	-0.448743	-3.24558	-1.57741		-0.0280019
	26.5	2.60634	2.78177	2.90238	2.7635		0.0373474		0.518128	1.034	2.36287	1.305		0.0150205		-0.612328	0.0365815	-0.610396	-0.395381		-0.0040036		-1.14295	-3.04821	-2.56336	-2.25151		-0.0165908		-1.98102	-1.06863	-3.71398	-2.25454		-0.0400221
	27	2.37739	2.51877	2.23398	2.37671		0.0321202		0.547327	1.13489	0.847812	0.843341		0.00970685		-0.664004	-0.371776	-0.95216	-0.662647		-0.00670992		-2.23241	-3.96582	-3.54531	-3.24785		-0.0239325		-2.68566	-1.97255	-4.067	-2.9084		-0.0516293
	27.5	2.24183	2.24742	1.25211	1.91379		0.025864		0.797657	1.17823	-0.0873128	0.629526		0.00724583		-0.724078	-0.0287873	-1.33318	-0.695348		-0.00704105		-3.23069	-4.62916	-3.83	-3.89662		-0.0287132		-3.53877	-3.11049	-4.24461	-3.63129		-0.0644619
	28	2.05555	1.86336	1.32761	1.74884		0.0236348		0.86733	0.824251	-0.544467	0.382372		0.00440109		-1.1431	-0.114168	-1.33383	-0.863701		-0.00874578		-3.65961	-4.83907	-3.68528	-4.06132		-0.0299268		-4.38666	-3.45006	-4.63493	-4.15722		-0.073798
	28.5	1.78121	1.8632	1.61645	1.75362		0.0236994		0.0301264	0.679139	-0.966034	-0.0855896		-0.000985135		-1.7183	-0.753952	-1.16571	-1.21265		-0.0122792		-4.23731	-5.52258	-4.33056	-4.69681		-0.0346096		-5.2361	-3.72354	-4.88642	-4.61536		-0.0819308
	29	1.47776	2.0578	1.27621	1.60392		0.0216763		-0.552653	0.234301	-0.917243	-0.411865		-0.00474056		-2.21867	-0.891466	-1.35935	-1.48983		-0.0150859		-5.08828	-6.49974	-5.00005	-5.52936		-0.0407444		-6.37597	-4.58733	-5.08807	-5.35046		-0.0949801
	29.5	1.08018	1.72977	1.17564	1.32853		0.0179545		-1.00717	-0.488569	-0.53546	-0.677067		-0.00779304		-2.77462	-1.29297	-1.50457	-1.85739		-0.0188078		-5.6051	-7.11917	-5.11384	-5.94603		-0.0438148		-7.5423	-4.99351	-5.31723	-5.95102		-0.105641
	30	0.777064	1.14677	1.6557	1.19318		0.0161252		-1.88566	-1.09168	-0.528417	-1.16859		-0.0134504		-3.4329	-2.09597	-1.88293	-2.4706		-0.0250171		-6.68444	-7.93371	-6.23159	-6.94992		-0.0512121		-8.26312	-5.26203	-5.73975	-6.42163		-0.113995
	30.5	0.581677	0.678118	1.20381	0.821203		0.0110982		-2.74433	-1.79375	-0.996695	-1.84493		-0.0212351		-4.09752	-2.46724	-2.87676	-3.14718		-0.0318681		-8.36385	-9.69181	-8.46853	-8.8414		-0.06515		-9.1025	-6.32686	-6.71217	-7.38051		-0.131017
	31	0.514709	0.13555	0.609023	0.41976		0.00567287		-2.96253	-2.71208	-1.80657	-2.49372		-0.0287027		-4.50812	-2.58127	-3.92626	-3.67188		-0.0371813		-10.205	-12.1367	-10.2428	-10.8615		-0.0800357		-10.3572	-7.37335	-8.28843	-8.67298		-0.153961
	31.5	0.405244	-0.370319	0.68278	0.239235		0.00323315		-3.36074	-3.44953	-2.85337	-3.22121		-0.0370761		-5.70961	-3.27171	-5.04378	-4.67503		-0.0473391		-12.6931	-14.7369	-12.4255	-13.2852		-0.0978951		-11.5245	-7.75836	-9.7728	-9.68523		-0.17193
	32	0.0748924	-0.481797	0.743081	0.112059		0.00151442		-4.03828	-4.45748	-4.01369	-4.16981		-0.0479945		-7.82444	-4.15232	-6.30846	-6.09507		-0.0617184		-15.5863	-17.4328	-16.0308	-16.35		-0.120479		-12.8066	-8.85426	-11.3178	-10.9929		-0.195143
	32.5	-0.238331	-0.456501	0.110839	-0.194664		-0.0026308		-4.89526	-5.50047	-5.00165	-5.13246		-0.0590745		-9.6153	-5.40445	-7.50174	-7.50716		-0.0760171		-18.3288	-20.4757	-19.2551	-19.3532		-0.142609		-14.8474	-10.3007	-13.1595	-12.7692		-0.226676
	33	-0.795758	-0.606181	-0.410342	-0.604094		-0.00816405		-5.91528	-6.29623	-6.37887	-6.19679		-0.071325		-11.2297	-6.87323	-8.95038	-9.01777		-0.0913134		-21.8808	-23.86	-21.906	-22.5489		-0.166157		-17.8763	-11.4247	-14.602	-14.6343		-0.259785
	33.5	-1.58761	-1.01821	-0.700744	-1.10219		-0.0148956		-7.09538	-7.19315	-7.54949	-7.27934		-0.0837851		-13.3933	-8.64771	-10.6738	-10.905		-0.110423		-25.9632	-27.1304	-25.5001	-26.1979		-0.193046		-21.1425	-12.8698	-15.5972	-16.5365		-0.293553
	34	-2.28701	-1.72369	-1.72507	-1.91192		-0.0258387		-8.61576	-8.38096	-8.87387	-8.62353		-0.0992567		-15.1965	-10.6877	-12.2552	-12.7132		-0.128733		-30.05	-30.6439	-29.5345	-30.0761		-0.221623		-24.7365	-15.0282	-16.6631	-18.8093		-0.333898
	34.5	-2.73901	-2.48991	-3.0188	-2.74924		-0.0371547		-10.2422	-9.72848	-10.6567	-10.2091		-0.117507		-16.5015	-12.4885	-14.5167	-14.5022		-0.146849		-34.8908	-34.7986	-33.6497	-34.4464		-0.253826		-28.7853	-16.498	-18.3412	-21.2081		-0.376482
	35	-3.69807	-3.35189	-4.11376	-3.72124		-0.0502908		-11.6812	-11.1049	-12.6052	-11.7971		-0.135785		-18.5028	-14.9355	-17.2994	-16.9126		-0.171256		-40.2833	-39.7911	-38.1737	-39.416		-0.290447		-32.8508	-17.6656	-20.233	-23.5832		-0.418643
	35.5	-4.77974	-4.69775	-5.31904	-4.93218		-0.0666561		-13.0793	-12.6778	-14.4235	-13.3935		-0.15416		-21.411	-17.6965	-19.7194	-19.609		-0.198559		-45.936	-45.0226	-43.2881	-44.7489		-0.329743		-36.2195	-19.5165	-22.2293	-25.9884		-0.46134
	36	-5.82678	-6.34019	-6.90774	-6.35824		-0.0859287		-14.9566	-14.6292	-16.5465	-15.3775		-0.176994		-24.8177	-20.1081	-22.2291	-22.385		-0.226669		-51.8658	-50.4537	-48.909	-50.4095		-0.371454		-39.942	-21.3326	-24.8932	-28.7226		-0.509877
	36.5	-7.36454	-7.98911	-8.59676	-7.98347		-0.107893		-17.2295	-16.6118	-18.7158	-17.519		-0.201644		-28.6936	-22.768	-25.4228	-25.6281		-0.259509		-58.0746	-56.7683	-54.9401	-56.5943		-0.417029		-44.0593	-23.2582	-27.9472	-31.7549		-0.563705
	37	-9.43566	-9.91542	-10.9979	-10.1163		-0.136718		-19.8079	-18.6777	-21.1314	-19.8723		-0.22873		-32.9501	-25.8558	-28.5749	-29.1269		-0.294938		-64.7491	-63.7583	-60.6635	-63.0569		-0.46465		-48.3754	-25.6553	-30.6398	-34.8902		-0.619362
	37.5	-11.2813	-12.0581	-13.6999	-12.3464		-0.166856		-22.7272	-21.1793	-24.2113	-22.7059		-0.261345		-37.4534	-28.3538	-31.7337	-32.5136		-0.329231		-72.1044	-70.4303	-67.264	-69.9329		-0.515318		-53.1806	-28.3471	-33.2414	-38.2564		-0.679118
	38	-13.1782	-13.7804	-16.3579	-14.4388		-0.195134		-26.1473	-24.0009	-27.9247	-26.0243		-0.29954		-42.0391	-31.3664	-35.6334	-36.3463		-0.36804		-79.749	-77.8061	-75.1664	-77.5738		-0.571621		-58.6687	-31.0328	-36.3182	-42.0066		-0.745692
	38.5	-15.7243	-15.493	-19.9847	-17.0673		-0.230657		-29.7187	-27.2802	-32.5308	-29.8433		-0.343495		-46.7652	-35.5578	-40.3733	-40.8988		-0.414138		-88.2334	-86.3468	-83.6414	-86.0739		-0.634256		-63.9309	-33.607	-39.1482	-45.5621		-0.808808
	39	-18.515	-17.8214	-24.1239	-20.1534		-0.272365		-33.3994	-31.1077	-37.5631	-34.0234		-0.391609		-51.9655	-39.7668	-45.4132	-45.7152		-0.462909		-97.5921	-94.9512	-92.5795	-95.0409		-0.700332		-68.8625	-35.603	-42.0938	-48.8531		-0.86723
	39.5	-21.5206	-20.5958	-27.7344	-23.2836		-0.314667		-37.4467	-35.1472	-42.9562	-38.5167		-0.443327		-58.1831	-44.2905	-50.5243	-50.9993		-0.516416		-106.677	-103.271	-101.701	-103.883		-0.765486		-73.4152	-37.2969	-45.2748	-51.9956		-0.923015
	40	-25.0037	-23.8996	-32.0429	-26.9821		-0.36465		-42.1644	-40.0968	-48.6103	-43.6239		-0.50211		-65.0315	-49.7	-56.2161	-56.9825		-0.577002		-115.406	-111.721	-110.965	-112.697		-0.830437		-77.1108	-38.4826	-47.904	-54.4991		-0.967456
	40.5	-29.0126	-28.0052	-37.5893	-31.5357		-0.426191		-47.3051	-45.6955	-54.3698	-49.1235		-0.56541		-72.1263	-55.0992	-62.3604	-63.1953		-0.639912		-123.697	-119.64	-119.164	-120.834		-0.890392		-79.5452	-38.8325	-49.4189	-55.9322		-0.992896
	41	-33.3271	-32.3448	-42.7028	-36.1249		-0.488212		-52.5714	-51.0398	-60.2395	-54.6169		-0.62864		-79.8262	-60.063	-68.5389	-69.476		-0.70351		-130.638	-126.065	-125.927	-127.544		-0.939836		-80.2374	-38.6604	-50.0993	-56.3324		-1
	41.5	-37.7555	-36.6576	-47.6789	-40.6973		-0.550006		-57.9714	-56.3683	-66.7307	-60.3568		-0.694706		-87.8979	-65.3171	-74.767	-75.994		-0.769511		-135.324	-130.63	-131.015	-132.323		-0.975052		-79.4542	-37.9702	-49.3514	-55.5919		-0.986856
	42	-42.1976	-41.3594	-54.084	-45.8803		-0.620052		-63.343	-61.9936	-73.1822	-66.1729		-0.761649		-95.3502	-70.9442	-81.6565	-82.6503		-0.836912		-138.164	-133.275	-134.712	-135.384		-0.997607		-76.4022	-36.2816	-46.7915	-53.1584		-0.943657
	42.5	-47.1486	-46.096	-60.469	-51.2379		-0.692456		-68.1366	-66.7676	-79.5739	-71.4927		-0.82288		-102.088	-75.6118	-88.4183	-88.7061		-0.898233		-138.357	-133.23	-135.538	-135.708		-1		-70.5536	-33.2053	-42.848	-48.869		-0.867511
	43	-51.9642	-50.7152	-65.9772	-56.2188		-0.759772		-72.6672	-70.8224	-86.0502	-76.5132		-0.880666		-107.723	-79.5019	-93.8125	-93.679		-0.948587		-134.504	-129.191	-132.624	-132.106		-0.973457		-62.0002	-28.77	-37.5091	-42.7598		-0.759062
	43.5	-56.0014	-55.5839	-71.7811	-61.1221		-0.826038		-76.8336	-74.5925	-91.4522	-80.9594		-0.931842		-111.391	-82.6945	-97.4365	-97.1741		-0.983979		-125.825	-121.081	-126.083	-124.33		-0.916155		-51.4145	-23.0124	-30.8481	-35.0917		-0.62294
	44	-59.8352	-60.3929	-77.6152	-65.9478		-0.891254		-79.9753	-77.5381	-95.3534	-84.2889		-0.970164		-113.019	-83.9821	-99.2682	-98.7563		-1		-112.516	-109.016	-115.527	-112.353		-0.8279		-38.4851	-15.7799	-22.5918	-25.6189		-0.454782
	44.5	-63.3253	-64.2452	-81.8657	-69.8121		-0.943478		-81.9484	-79.0725	-98.1505	-86.3905		-0.994353		-112.131	-83.005	-98.7066	-97.9475		-0.99181		-94.9018	-93.3019	-100.855	-96.353		-0.710001		-24.4866	-7.63932	-13.3665	-15.1641		-0.269191
	45	-65.166	-67.2169	-84.8993	-72.4274		-0.978823		-82.6315	-79.0303	-98.9814	-86.8811		-1		-108.064	-80.208	-94.9393	-94.4037		-0.955926		-73.7211	-74.06	-82.7543	-76.8451		-0.566252		-10.6864	0.750412	-4.18486	-4.70694		-0.0835565
	45.5	-65.6963	-69.253	-87.0338	-73.9944		-1		-81.0155	-77.2379	-97.2752	-85.1762		-0.980377		-101.359	-75.2316	-88.5675	-88.3861		-0.894993		-51.1265	-53.021	-62.9604	-55.7026		-0.410458		2.21169	8.71003	4.34975	5.09049		0.0903652
	46	-65.1608	-69.3687	-86.9963	-73.842		-0.99794		-77.0486	-73.3649	-93.4029	-81.2721		-0.935441		-91.5923	-67.9055	-80.3193	-79.939		-0.809458		-28.7372	-31.9585	-42.1927	-34.2962		-0.25272		13.5863	15.8584	12.6431	14.0293		0.249045
	46.5	-62.9487	-67.7588	-84.6718	-71.7931		-0.970251		-71.3074	-67.3474	-87.1176	-75.2575		-0.866212		-78.4923	-58.6013	-70.2584	-69.1174		-0.699878		-7.95202	-11.8121	-22.4063	-14.0568		-0.103581		22.6075	21.7738	19.3294	21.2369		0.376993
	47	-59.0862	-64.9691	-80.4174	-68.1576		-0.921119		-63.3843	-59.5866	-78.3104	-67.0938		-0.772248		-63.5114	-47.0415	-57.8105	-56.1211		-0.568279		10.1359	6.67729	-4.5963	4.07228		0.0300076		29.4058	26.1657	24.0752	26.5489		0.47129
	47.5	-54.4348	-60.4226	-74.3974	-63.0849		-0.852564		-53.5289	-50.845	-67.9975	-57.4571		-0.66133		-47.9785	-34.9306	-44.9376	-42.6156		-0.431523		24.9096	21.5239	10.6246	19.0194		0.140149		34.3953	28.6665	27.8009	30.2876		0.537658
	48	-48.9274	-53.9081	-66.4339	-56.4231		-0.762533		-42.8749	-40.8568	-56.2082	-46.6466		-0.536902		-32.2739	-23.0208	-33.0748	-29.4565		-0.298275		36.7409	32.8987	22.6092	30.7496		0.226586		37.3198	30.2331	30.5638	32.7056		0.580582
	48.5	-42.3171	-46.6319	-57.4965	-48.8152		-0.659715		-32.3034	-30.5798	-43.7121	-35.5318		-0.40897		-17.7818	-11.2413	-21.9688	-16.9973		-0.172114		45.1875	41.5728	31.2474	39.3359		0.289856		38.6741	31.2257	32.0494	33.9831		0.60326
	49	-35.0219	-38.547	-47.7743	-40.4477		-0.546633		-21.8168	-21.0003	-31.9341	-24.9171		-0.286795		-6.001	-1.21009	-12.077	-6.42937		-0.0651034		50.1283	47.6083	37.5588	45.0985		0.332319		39.0771	31.2481	32.7278	34.351		0.609792
	49.5	-27.6256	-29.7181	-37.9228	-31.7555		-0.429161		-12.3161	-12.108	-21.3124	-15.2455		-0.175475		3.30402	5.92145	-4.91112	1.43812		0.0145623		53.266	51.3452	41.5882	48.7331		0.359102		38.8341	30.8906	33.2339	34.3195		0.609233
	50	-20.5031	-21.4691	-29.2736	-23.7486		-0.320952		-4.57825	-4.28831	-12.0465	-6.97103		-0.0802364		10.2752	11.6363	-0.00948629	7.30066		0.0739261		55.1873	53.5764	43.4792	50.7476		0.373946		38.0189	30.6089	33.5373	34.0551		0.604538
	50.5	-14.085	-14.6186	-21.7976	-16.8337		-0.2275		1.59655	1.36093	-4.82781	-0.623446		-0.00717586		14.4862	16.1195	4.06974	11.5585		0.117041		55.5104	54.5431	44.3519	51.4685		0.379258		37.2029	30.0134	33.7234	33.6466		0.597287
	51	-9.27288	-8.9234	-15.8942	-11.3635		-0.153573		6.50316	5.42448	0.19974	4.04246		0.0465287		16.161	18.7191	6.71749	13.8659		0.140405		55.0964	54.4566	44.271	51.2746		0.37783		36.2488	28.9673	33.5359	32.9173		0.584341
	51.5	-5.88011	-4.88393	-12.1523	-7.63876		-0.103234		9.98278	8.71422	4.07995	7.59232		0.0873874		16.6794	20.4723	8.22295	15.1249		0.153153		55.0739	53.4874	43.3581	50.6398		0.373152		35.5945	28.4085	33.5064	32.5031		0.576989
	52	-3.46013	-2.47738	-9.61485	-5.18412		-0.070061		12.3309	10.7338	7.09565	10.0534		0.115715		16.5164	21.9561	9.41449	15.9623		0.161634		54.5086	52.0805	42.3788	49.656		0.365902		35.0196	27.9729	33.2338	32.0754		0.569396
	52.5	-1.92064	-0.447153	-7.09384	-3.15388		-0.0426232		13.9672	12.0753	9.29901	11.7805		0.135594		16.0142	22.9484	10.353	16.4385		0.166456		53.4771	50.9597	42.2202	48.8857		0.360226		34.4385	27.6396	32.4705	31.5162		0.559469
	53	-0.817624	1.03596	-5.74711	-1.84292		-0.0249063		15.1053	13.3781	11.0168	13.1667		0.151549		16.0091	23.6176	10.4941	16.7069		0.169173		52.8429	50.2821	42.1454	48.4235		0.35682		34.1022	27.4819	31.7388	31.1076		0.552216
	53.5	0.628296	1.93779	-4.91077	-0.781561		-0.0105624		15.9985	14.4996	12.5525	14.3502		0.165171		16.457	24.1555	11.2674	17.2933		0.175111		52.1323	49.9522	42.1567	48.0804		0.354292		33.9253	27.2699	31.334	30.8431		0.547519
	54	2.21211	3.32856	-3.69223	0.616147		0.00832694		16.9242	15.2318	13.8753	15.3438		0.176607		16.9942	24.4136	12.2805	17.8961		0.181215		51.6222	49.7891	42.8071	48.0728		0.354236		33.4983	26.7845	30.8293	30.3707		0.539133
	54.5	3.37671	4.57222	-3.15705	1.59729		0.0215867		17.4894	15.8371	15.1235	16.15		0.185886		17.1236	25.021	12.5998	18.2481		0.184779		51.4896	49.3653	43.6088	48.1546		0.354838		32.9558	26.4023	30.2159	29.858		0.530033
	55	4.58471	4.64233	-3.345	1.96068		0.0264977		17.9458	16.4743	16.3584	16.9262		0.19482		16.9055	25.84	13.2453	18.6636		0.188987		51.2994	48.7168	43.451	47.8224		0.352391		32.1522	25.7324	29.827	29.2372		0.519012
	55.5	5.8333	4.96469	-3.0842	2.57126		0.0347494		18.6703	16.9139	17.6424	17.7422		0.204213		16.2606	26.5255	14.0448	18.9437		0.191822		50.7678	47.991	43.637	47.4653		0.349759		30.9488	24.6437	29.2757	28.2894		0.502188
	56	6.43733	5.74102	-2.49141	3.22898		0.0436382		19.1286	17.4127	19.2697	18.6037		0.214128		15.7695	27.3489	13.9344	19.0176		0.192571		50.6891	47.1194	44.7468	47.5184		0.350151		30.2816	24.2923	28.4423	27.6721		0.491228
	56.5	6.58305	6.29669	-2.13086	3.58296		0.0484221		19.208	17.9674	20.4692	19.2148		0.221162		15.8058	28.5111	14.0163	19.4444		0.196893		50.2517	46.5083	45.7968	47.5189		0.350155		29.8434	23.9686	27.5639	27.1253		0.481522
	57	6.92693	6.97365	-1.64074	4.08661		0.0552287		19.5372	18.4937	21.2295	19.7535		0.227362		16.1607	29.2492	14.667	20.0256		0.202778		49.645	46.3592	46.8073	47.6038		0.35078		29.279	23.1271	27.0198	26.4753		0.469983
	57.5	7.68186	8.25139	-0.519992	5.13775		0.0694343		19.8421	19.0189	21.6197	20.1603		0.232044		16.9064	29.3503	14.465	20.2406		0.204955		49.2983	46.4376	48.4558	48.0639		0.354171		29.0058	22.9038	26.5326	26.1474		0.464163
	58	8.45404	9.69766	0.759893	6.30386		0.0851938		19.4481	19.5623	21.3986	20.1363		0.231769		17.8334	29.2057	14.5442	20.5278		0.207863		49.0745	46.2714	49.5564	48.3008		0.355916		28.9913	23.3537	25.8598	26.0683		0.462758
	58.5	8.8602	10.5122	1.53747	6.96996		0.0941958		19.3092	19.7515	20.7016	19.9207		0.229288		18.1592	28.8185	14.8935	20.6237		0.208834		48.6033	45.5578	49.4552	47.8721		0.352757		28.1701	22.6261	25.1867	25.3276		0.449611
	59	9.30799	10.8154	2.11946	7.41428		0.100201		19.3464	19.6668	19.9647	19.6593		0.226278		17.8731	28.1095	13.9197	19.9674		0.202189		47.8967	44.4393	48.8209	47.0523		0.346716		26.7115	21.629	24.2912	24.2106		0.429781
	59.5	10.0443	11.6464	3.20877	8.29984		0.112169		19.3622	19.9604	19.0621	19.4616		0.224002		17.9688	26.9758	12.8063	19.2503		0.194928		46.9716	43.0501	47.7681	45.93		0.338446		25.7658	21.563	23.2541	23.5276		0.417657
	60	10.2678	12.2428	3.7106	8.74039		0.118122		19.6776	20.3319	18.5654	19.525		0.224732		17.4455	26.21	12.5957	18.7504		0.189865		45.9788	41.0676	46.3577	44.468		0.327673		25.1219	21.3546	22.1929	22.8898		0.406335
	60.5	9.76994	12.0211	3.11859	8.30321		0.112214		20.2954	20.7949	18.4102	19.8335		0.228283		16.4891	25.6439	11.85	17.9943		0.182209		45.3069	39.1049	45.2836	43.2318		0.318564		24.282	20.5355	21.41	22.0758		0.391886
	61	10.0378	12.5479	2.81944	8.46839		0.114446		20.8913	21.6132	17.9815	20.162		0.232064		16.2817	25.0126	10.5945	17.2963		0.175141		44.6043	38.0427	44.6446	42.4305		0.312659		23.7008	20.3292	20.8261	21.6187		0.383771
	61.5	10.6715	13.4086	2.57721	8.88579		0.120087		21.6024	22.5484	17.5663	20.5723		0.236787		16.0662	24.4949	10.3929	16.9847		0.171986		44.2598	37.1479	44.0423	41.8167		0.308136		23.6197	20.2867	20.5036	21.47		0.381131
	62	10.6128	13.0568	1.44017	8.36993		0.113116		22.1399	22.9	17.2556	20.7651		0.239006		15.2953	24.3495	10.1791	16.608		0.168171		44.0734	36.341	43.999	41.4711		0.30559		23.308	19.3485	20.3793	21.0119		0.372999
	62.5	10.5344	13.0413	0.154219	7.91		0.1069		22.3625	22.8256	16.3392	20.5091		0.236059		14.9042	23.9997	9.24316	16.049		0.162512		43.3662	36.2064	43.7348	41.1025		0.302874		22.6536	18.0962	20.1781	20.3093		0.360526
	63	11.1178	13.5553	-0.523096	8.05		0.108792		22.7183	22.9005	15.1309	20.2499		0.233076		14.4556	23.4694	8.29057	15.4052		0.155992		41.836	35.9865	42.7203	40.1809		0.296083		22.1753	17.1284	19.7541	19.6859		0.34946
	63.5	11.4784	12.9007	-1.31916	7.68665		0.103882		22.621	22.5805	14.2214	19.8077		0.227986		13.5119	22.8923	7.54809	14.6508		0.148353		40.0679	35.5797	41.4598	39.0358		0.287645		21.9077	16.4373	19.1506	19.1652		0.340217
	64	11.3687	11.7647	-2.07401	7.0198		0.0948694		22.0536	21.5615	13.4173	19.0108		0.218814		12.7486	21.9438	6.46987	13.7207		0.138935		37.9788	35.3836	39.9747	37.779		0.278384		21.6485	16.1625	18.4084	18.7398		0.332665
	64.5	11.7315	11.8003	-2.45286	7.0263		0.0949572		21.4789	20.7282	12.5257	18.2443		0.209991		12.1894	21.1283	5.49625	12.938		0.131009		35.8326	34.8768	37.5758	36.0951		0.265975		21.515	16.1813	17.1761	18.2908		0.324694
	65	12.1835	11.6347	-2.97616	6.94732		0.0938899		20.7425	19.9469	11.9678	17.5524		0.202028		11.8865	20.4641	4.84014	12.3969		0.12553		33.9431	33.764	35.317	34.3414		0.253053		21.5133	16.0968	16.0818	17.8973		0.317709
	65.5	12.0591	11.0119	-3.48001	6.53033		0.0882544		19.7508	18.2292	11.8184	16.5995		0.19106		12.3504	19.7256	4.32654	12.1342		0.12287		32.7707	33.2602	33.6398	33.2236		0.244816		21.6966	16.0814	15.454	17.744		0.314987
	66	11.9684	11.3268	-3.69826	6.53232		0.0882813		18.8747	16.6113	11.6228	15.7029		0.18074		13.0228	19.1283	4.04992	12.067		0.12219		32.1922	32.1593	31.7443	32.0319		0.236035		22.0501	15.8296	14.8654	17.5817		0.312107
	66.5	12.041	11.9169	-3.97487	6.66099		0.0900203		18.0773	16.0042	11.4585	15.18		0.174721		13.5309	19.0767	3.78592	12.1312		0.12284		31.5019	30.339	29.839	30.56		0.225188		22.3197	15.0004	14.3862	17.2354		0.305959
	67	11.4367	11.9298	-4.56749	6.26635		0.0846868		17.4058	15.2206	11.251	14.6258		0.168343		13.9997	19.2008	3.60194	12.2675		0.12422		30.6848	29.7131	28.557	29.6516		0.218495		22.8134	14.0842	14.5749	17.1575		0.304576
	67.5	10.5729	11.8732	-4.47848	5.98921		0.0809414		17.0203	14.1911	10.8169	14.0094		0.161248		14.0473	19.384	3.68515	12.3722		0.12528		30.3273	29.5054	27.1565	28.9964		0.213667		23.505	13.49	14.6236	17.2062		0.305441
	68	10.3702	12.0818	-3.92189	6.17669		0.0834752		16.7187	14.1072	10.1803	13.6687		0.157327		13.8041	19.9139	4.312	12.6767		0.128363		29.6999	27.8752	25.5116	27.6956		0.204081		24.0049	12.848	14.1083	16.9871		0.301551
	68.5	10.1523	12.0209	-4.18479	5.99612		0.0810348		16.7051	13.9594	9.64916	13.4379		0.15467		13.8938	20.5802	5.01274	13.1623		0.13328		28.5154	26.792	24.2057	26.5044		0.195304		24.2645	12.255	13.8507	16.79		0.298053
	69	9.84199	12.16	-4.4959	5.83536		0.0788622		16.802	13.3508	9.44	13.1976		0.151904		14.2328	20.7499	5.28504	13.4226		0.135916		28.0095	26.5401	23.0571	25.8689		0.190621		24.4762	12.0595	13.6016	16.7124		0.296675
	69.5	10.1523	12.1369	-4.36931	5.97332		0.0807266		16.7257	13.7055	9.72233	13.3845		0.154056		14.7435	20.1672	5.34749	13.4194		0.135884		27.966	24.9506	22.0172	24.9779		0.184056		23.8117	12.189	12.8226	16.2744		0.2889
	70	10.7955	12.009	-4.91555	5.96298		0.0805869		16.6809	14.4637	10.0639	13.7361		0.158103		15.5849	19.4618	5.53729	13.528		0.136984		27.5353	23.5863	21.2195	24.1137		0.177688		22.6946	12.1967	12.2871	15.7262		0.279167
	70.5	11.2587	11.8747	-6.44266	5.56357		0.0751891		16.5246	14.9498	10.1157	13.8634		0.159567		16.1586	18.7182	4.87672	13.2512		0.134181		27.0453	23.8481	20.3779	23.7571		0.17506		21.5422	11.9748	12.0504	15.1891		0.269634
	71	11.4116	11.5855	-7.39308	5.20135		0.0702938		16.1725	16.1912	9.97007	14.1113		0.16242		16.0102	17.5821	3.83515	12.4758		0.126329		26.9765	23.4556	19.7399	23.3907		0.17236		20.0015	11.5575	11.3517	14.3035		0.253913
	71.5	11.1859	10.999	-8.53307	4.55061		0.0614994		15.7618	17.369	9.26037	14.1304		0.162641		15.9863	16.8963	2.95956	11.9474		0.120978		26.4378	22.2904	19.6917	22.8066		0.168056		18.4932	11.1998	10.9688	13.5539		0.240607
	72	10.5818	10.8354	-10.1647	3.75081		0.0506904		15.205	17.709	8.727	13.8803		0.159762		16.2982	16.8474	1.64015	11.5953		0.117413		25.2847	22.0412	19.6591	22.3283		0.164532		17.5804	10.6777	10.741	12.9997		0.230768
	72.5	10.0245	10.767	-11.6202	3.05708		0.0413151		14.439	18.1562	9.60067	14.0653		0.161891		15.9639	16.6071	0.287394	10.9528		0.110907		24.1851	21.7832	19.4594	21.8092		0.160707		17.0239	10.0881	10.3141	12.4754		0.22146
	73	9.05058	10.4312	-12.5089	2.3243		0.0314119		13.9563	18.0944	11.0619	14.3708		0.165408		15.5329	16.3124	-0.0512809	10.598		0.107315		23.1704	20.6137	19.2104	20.9982		0.15473		16.4426	9.85042	10.0906	12.1279		0.215291
	73.5	7.96018	10.1257	-13.1197	1.65538		0.0223717		13.5732	16.8445	12.652	14.3566		0.165244		15.3126	16.5614	-0.150134	10.5746		0.107078		21.8192	20.3677	19.0056	20.3975		0.150304		16.3269	9.9229	9.94002	12.0633		0.214144
	74	7.79744	10.0178	-13.6279	1.39577		0.0188633		13.5707	15.7587	14.4543	14.5946		0.167984		13.9178	16.6102	0.485181	10.3377		0.104679		20.6019	21.1726	18.9736	20.2494		0.149212		16.3357	9.70324	9.45674	11.8319		0.210037
	74.5	8.18553	9.61657	-13.491	1.43704		0.0194209		14.0558	14.6984	15.1227	14.6256		0.168341		11.3069	16.7366	2.12616	10.0565		0.101832		19.8513	21.2234	18.6396	19.9048		0.146673		16.0424	9.45713	9.24782	11.5825		0.205609
	75	7.89481	9.20942	-13.0208	1.36114		0.0183952		14.6269	13.3858	13.4676	13.8268		0.159146		9.72333	17.2233	3.61391	10.1869		0.103151		19.1856	20.8997	18.5988	19.5614		0.144143		15.8406	9.21853	9.01434	11.3578		0.201622
	75.5	8.03492	9.48606	-12.671	1.61665		0.0218483		15.214	12.6582	10.9727	12.9483		0.149035		9.18637	17.4011	4.8878	10.4918		0.106239		18.8321	20.8952	19.2421	19.6565		0.144843		15.6036	8.88598	8.39256	10.9607		0.194572
	76	8.67739	10.1237	-12.3856	2.13851		0.028901		15.8041	12.8767	8.3258	12.3355		0.141982		9.4945	17.1528	6.99398	11.2138		0.11355		18.483	20.2926	19.9518	19.5758		0.144249		14.9122	8.45775	8.29764	10.5559		0.187385
	76.5	8.525	10.4497	-11.2864	2.56275		0.0346344		15.7799	13.2393	5.24413	11.4211		0.131457		11.7268	16.9162	9.1774	12.6068		0.127656		18.2259	19.2106	20.3467	19.2611		0.14193		14.1742	8.15978	8.36019	10.2314		0.181625
	77	8.30117	10.3052	-10.1455	2.82028		0.0381148		15.4926	13.3643	2.60462	10.4872		0.120707		14.9998	16.3001	10.5802	13.9601		0.141359		18.0861	18.8425	21.4392	19.4559		0.143366		13.5541	8.0572	8.08829	9.89986		0.17574
	77.5	8.83131	10.2976	-8.51172	3.53908		0.047829		15.3983	13.6347	1.36315	10.1321		0.11662		18.0963	15.2267	11.1116	14.8115		0.149981		17.9731	18.2462	22.7313	19.6502		0.144797		12.2274	8.10736	7.89091	9.40855		0.167018
	78	9.32196	9.71083	-5.47182	4.52032		0.0610901		14.937	13.7482	1.1365	9.94057		0.114416		20.5219	14.4831	10.4585	15.1545		0.153454		17.948	17.2351	23.7119	19.6317		0.144661		11.2598	7.79107	8.01162	9.02082		0.160136
	78.5	9.81692	8.69133	-2.12525	5.461		0.073803		14.741	13.6023	1.31992	9.88773		0.113808		21.7448	14.2459	8.37526	14.7886		0.149749		18.3384	16.3203	24.3513	19.67		0.144943		11.1187	7.64633	8.04084	8.93529		0.158617
	79	10.3726	8.53613	0.823167	6.57731		0.0888893		15.1576	13.5156	3.13698	10.6034		0.122045		21.7322	13.8185	5.50089	13.6839		0.138562		18.3564	15.2165	24.117	19.23		0.141701		10.6183	7.55662	7.89751	8.69082		0.154278
	79.5	10.6576	9.39083	4.19125	8.07989		0.109196		15.5055	13.902	5.82712	11.7449		0.135183		21.5049	13.4392	2.76799	12.5707		0.12729		17.7571	13.5571	23.4822	18.2655		0.134594		10.0418	6.99674	7.59569	8.21142		0.145767
	80	10.8364	10.1383	7.15603	9.37689		0.126724		15.5331	14.4007	8.2866	12.7401		0.146639		21.0824	14.2146	0.528423	11.9418		0.120922		17.3198	12.6742	22.4757	17.4899		0.128878		9.96493	6.53516	7.6336	8.04457		0.142805
	80.5	10.8518	11.3411	8.74769	10.3135		0.139382		15.6947	15.015	10.8133	13.841		0.15931		21.2309	14.8512	-0.491677	11.8635		0.120129		16.3196	12.8154	20.8018	16.6456		0.122657		9.46778	6.24447	7.69729	7.80318		0.13852
	81	10.9303	12.8544	10.3024	11.3624		0.153558		15.3533	15.327	13.2473	14.6425		0.168535		22.4305	14.7085	-0.61368	12.1751		0.123285		15.0379	13.0321	19.4191	15.8297		0.116645		8.49116	5.88271	7.12161	7.16516		0.127194
	81.5	11.6459	13.6396	12.0228	12.4361		0.168068		14.7068	15.3028	14.2439	14.7512		0.169786		23.7677	15.2687	-0.472711	12.8546		0.130164		14.3062	13.5191	18.6082	15.4778		0.114052		8.1335	5.78239	6.54065	6.81884		0.121047
	82	12.4066	14.1026	12.9934	13.1676		0.177954		14.2457	15.1729	14.2418	14.5535		0.16751		24.5759	15.7702	0.222606	13.5229		0.136932		13.957	14.1558	16.9006	15.0045		0.110564		8.2029	5.85707	6.36597	6.80865		0.120866
	82.5	13.1469	14.4853	14.3443	13.9922		0.189098		13.8209	14.8611	13.8111	14.1644		0.163032		24.6246	14.5046	1.27063	13.4666		0.136362		13.4097	13.7335	15.5153	14.2195		0.10478		8.33594	5.57774	5.70706	6.54025		0.116101
	83	13.98	14.6432	15.9673	14.8635		0.200873		13.5874	14.5203	12.5187	13.5422		0.15587		23.3663	13.217	1.50453	12.6959		0.128558		13.1245	12.4995	14.7235	13.4492		0.0991035		8.57938	5.65204	4.90269	6.37804		0.113221
	83.5	14.5288	14.224	17.9906	15.5811		0.210572		13.2225	14.7087	9.85299	12.5947		0.144965		20.8782	12.3369	1.29686	11.504		0.116489		13.2093	10.75	14.6059	12.8551		0.0947258		8.46191	4.82231	5.01345	6.09922		0.108272
	84	14.8924	14.1231	19.2464	16.0873		0.217413		13.0894	14.8293	8.36827	12.0956		0.139221		19.3397	10.9436	1.42023	10.5678		0.107009		13.0067	9.38034	14.3883	12.2584		0.0903292		8.47089	4.22554	4.85617	5.85087		0.103863
	84.5	16.3772	14.2188	23.9036	18.1665		0.245513		13.3022	16.7664	5.34079	11.8032		0.135854		18.0289	10.4436	0.678128	9.71688		0.0983926		14.389	7.57049	17.6376	13.199		0.0972602		8.08525	2.58636	5.87715	5.51625		0.0979233
	85	7.68231	5.97795	12.4264	8.69556		0.117517		5.69722	8.141	0.653075	4.83043		0.0555982		7.22116	4.57142	-0.172638	3.87331		0.0392209		6.88747	2.49082	9.25199	6.21009		0.0457606		3.13757	0.207222	3.15447	2.16642		0.0384578

## Sheet: ROX
	Temperature	A1	A2	A3	A4	A5	A6	A7	A8	A9	A10	A11	A12	B1	B2	B3	B4	B5	B6	B7	B8	B9	B10	B11	B12	C1	C2	C3	C4	C5	C6	C7	C8	C9	C10	C11	C12	D1	D2	D3	D4	D5	D6	D7	D8	D9	D10	D11	D12
	4	0.289502	0.237004	0.46477	0.57501	-0.00658446	0.357672	1.63035	0.207987	-3.65786	2.21726	2.54089	1.98698	4.44435	1.34819	1.53858	-0.590568	-0.0317539	-0.101312	-0.554633	0.0550779	-0.274385	-0.537315	-0.0808356	-0.184726	-0.682167	-0.00782654	0.0221875	-0.140459	0.228663	-0.505529	0.112515	-0.241819	-0.0136623	0.0399293	-0.355638	0.164095	-0.276654	-0.326116	-0.709767	-0.359397	-0.428943	-0.471492	-0.324103	-0.353956	-0.10541	-0.427563	-0.305639	0.0344486
	4.5	0.627254	0.513508	1.007	1.24585	-0.0142663	0.774956	3.53243	0.450638	-7.92536	4.80405	5.50527	4.30511	9.62943	2.92109	3.33358	-1.27956	-0.0688002	-0.219509	-1.2017	0.119336	-0.594501	-1.16418	-0.175144	-0.40024	-1.47803	-0.0169575	0.0480728	-0.304328	0.495436	-1.09531	0.243783	-0.523941	-0.0296017	0.0865134	-0.77055	0.35554	-0.599416	-0.706585	-1.53783	-0.778695	-0.929375	-1.02157	-0.702224	-0.766904	-0.228388	-0.926387	-0.662219	0.0746387
	5	0.579003	0.474008	0.92954	1.15002	-0.0131689	0.715344	3.2607	0.415974	-7.31571	4.43451	5.08179	3.97395	8.88871	2.69639	3.07715	-1.18114	-0.0635079	-0.202624	-1.10927	0.110156	-0.54877	-1.07463	-0.161671	-0.369453	-1.36433	-0.0156531	0.0443749	-0.280918	0.457326	-1.01106	0.22503	-0.483638	-0.0273246	0.0798585	-0.711277	0.328191	-0.553307	-0.652232	-1.41953	-0.718795	-0.857885	-0.942985	-0.648207	-0.707912	-0.210819	-0.855127	-0.611279	0.0688973
	5.5	0.579003	0.474008	0.92954	1.15002	-0.0131689	0.715344	3.2607	0.415974	-7.31571	4.43451	5.08179	3.97395	8.88871	2.69639	3.07715	-1.18114	-0.0635079	-0.202624	-1.10927	0.110156	-0.54877	-1.07463	-0.161671	-0.369453	-1.36433	-0.0156531	0.0443749	-0.280918	0.457326	-1.01106	0.22503	-0.483638	-0.0273246	0.0798585	-0.711277	0.328191	-0.553307	-0.652232	-1.41953	-0.718795	-0.857885	-0.942985	-0.648207	-0.707912	-0.210819	-0.855127	-0.611279	0.0688973
	6	0.579003	0.474008	0.92954	1.15002	-0.0131689	0.715344	3.2607	0.415974	-7.31571	4.43451	5.08179	3.97395	8.88871	2.69639	3.07715	-1.18114	-0.0635079	-0.202624	-1.10927	0.110156	-0.54877	-1.07463	-0.161671	-0.369453	-1.36433	-0.0156531	0.0443749	-0.280918	0.457326	-1.01106	0.22503	-0.483638	-0.0273246	0.0798585	-0.711277	0.328191	-0.553307	-0.652232	-1.41953	-0.718795	-0.857885	-0.942985	-0.648207	-0.707912	-0.210819	-0.855127	-0.611279	0.0688973
	6.5	0.626444	0.489919	0.942673	1.20603	0.00751455	0.703538	3.27625	0.431394	-7.55542	4.45898	5.06493	3.93121	8.84393	2.73211	3.10267	-1.18269	-0.0130129	-0.149263	-1.16972	0.125883	-0.489393	-1.07654	-0.165553	-0.329988	-1.31975	0.0259256	0.0806219	-0.220893	0.497161	-1.04993	0.218357	-0.494591	0.00882188	0.109217	-0.689235	0.373822	-0.502699	-0.614649	-1.38015	-0.673444	-0.841362	-0.95361	-0.666976	-0.702877	-0.190518	-0.799512	-0.601294	0.113352
	7	0.28613	0.408104	0.863536	0.843759	-0.20281	0.807769	3.21233	0.337832	-5.97426	4.32627	5.22276	4.2474	9.18342	2.43857	2.91012	-1.17712	-0.360628	-0.471396	-0.70686	0.0269523	-0.880841	-1.06226	-0.121214	-0.542494	-1.61816	-0.241625	-0.121921	-0.589256	0.242103	-0.760112	0.302619	-0.330817	-0.225458	-0.0969518	-0.879292	0.065346	-0.829347	-0.845326	-1.69838	-0.994562	-0.951041	-0.882741	-0.491452	-0.722056	-0.369764	-1.2074	-0.685741	-0.207507
	7.5	0.0105821	0.106246	0.638941	0.206133	0.0840593	0.750107	2.82267	0.0801606	-3.83283	3.89775	5.0385	4.35941	9.37608	2.49854	2.84845	-1.16714	-0.732473	-1.23223	-0.549394	-0.106544	-1.50942	-1.09233	-0.204445	-1.29239	-2.11002	-0.67981	-0.726949	-1.4009	-0.208466	-0.616717	0.0939625	-0.852671	-0.583184	-0.283306	-0.805817	-0.284409	-1.4	-1.33795	-1.67481	-1.25914	-1.10815	-0.77778	-0.669412	-0.879133	-0.218638	-1.49855	-0.669029	-0.465823
	8	0.12764	-0.172655	0.857484	0.328473	0.762824	0.521232	2.28948	0.404784	-2.05058	3.60394	4.9595	4.65371	8.73011	2.79971	2.88302	-0.878947	-0.882629	-1.36371	-0.999124	-0.551457	-1.304	-0.86008	-0.399581	-1.57512	-1.60024	-0.919958	-1.09794	-1.55489	-0.342315	-0.796472	-0.226169	-1.57638	-0.890942	-0.358625	-0.37286	-0.604954	-1.38631	-1.52381	-1.32128	-1.4578	-1.12413	-0.789944	-0.983658	-0.949165	-0.186223	-1.12954	-0.483055	-0.219498
	8.5	0.119227	-0.463541	1.14372	0.488885	0.795145	0.333148	2.13194	0.290745	0.235052	3.26846	4.82109	5.2991	8.32327	2.71383	2.45416	-0.531248	-1.01573	-0.955525	-0.891081	-0.893785	-1.06042	-0.477405	-0.483651	-0.904685	-0.884011	-1.07072	-1.08694	-0.995116	0.0126476	-0.438128	-0.257634	-1.39619	-0.855138	-0.377368	-0.260978	-1.18992	-1.16733	-1.3647	-1.61974	-1.10255	-1.20036	-0.925681	-0.976399	-0.673594	-0.322771	-0.669211	-0.137994	-0.310487
	9	-0.0716605	-0.586254	1.69372	0.345413	0.867209	0.734807	2.02774	-0.214284	2.37041	2.9825	4.28598	5.41985	7.65562	2.71752	1.90016	-0.394377	-1.02784	-1.13237	-0.266925	-1.09379	-1.12053	-0.228017	-0.0505112	-0.0627123	-0.370159	-0.947046	-1.14517	-0.235632	0.341688	0.306107	-0.198954	-1.19532	-0.754375	-0.582584	-0.384733	-1.18619	-1.12836	-1.23705	-1.48195	-0.505507	-1.32427	-1.17646	-1.25948	-0.454108	-0.360942	-0.24899	-0.0822548	-0.709184
	9.5	-0.241086	-0.267618	2.06724	0.591621	1.23025	1.09096	1.94556	0.20362	4.45215	3.35469	4.19592	5.31981	6.72363	2.47384	1.61317	-0.709091	-1.1425	-1.38847	-0.425278	-1.18122	-0.590455	-0.125173	-0.060752	0.404793	0.139012	-0.665106	-1.27542	0.357147	0.688828	0.247404	-0.464235	-1.33405	-0.758126	-0.516706	-0.231778	-0.734152	-0.721782	-1.38242	-0.821512	-0.499596	-1.49322	-1.42957	-1.97401	-0.402275	-0.76221	0.028236	-0.262198	-0.917995
	10	-0.324335	0.384122	2.08401	0.853847	1.03639	1.19963	2.05903	1.10453	5.27332	3.94442	4.33383	5.48477	6.67117	2.06278	1.50539	-0.866094	-0.85347	-1.09297	-0.895368	-1.22	-0.218109	-0.238117	-0.0237188	0.663115	0.366574	-0.547178	-0.983127	-0.366884	1.06389	-0.179519	-0.468831	-0.622222	-0.383898	0.02619	-0.105259	-0.8641	-0.329358	-1.24598	-0.502139	-0.462339	-1.62395	-1.39373	-1.89485	-0.284897	-1.09382	0.058203	-0.133683	-1.01509
	10.5	-0.549339	1.279	1.95077	0.264618	0.749717	1.35462	2.16371	1.1791	5.4623	4.40448	4.43201	5.21523	6.82523	1.4909	1.38573	-0.92408	-0.317392	-1.29275	-0.763873	-1.17729	-0.43897	-0.487469	0.457409	0.681164	0.429277	-0.198162	-0.461725	-1.3673	0.969782	-0.0726894	-0.0145217	0.153901	-0.218991	0.031591	-0.322494	-0.835489	-0.369309	-1.02072	-0.396953	-0.133858	-1.24893	-0.923497	-0.982142	-0.221282	-1.1335	-0.181814	-0.185802	-1.1019
	11	-0.491991	1.78126	1.92836	0.0860533	0.914064	1.43451	2.51912	1.20916	5.54997	4.73525	4.66421	4.51028	6.722	1.38104	1.06952	-1.20316	-0.236636	-1.4716	-0.62959	-0.805711	-0.462677	-0.680492	0.659138	0.289552	0.413107	0.296809	0.125756	-1.72604	0.766207	-0.2329	0.0437355	0.117139	-0.227252	-0.286806	-0.382027	-0.338892	-0.309118	-0.507137	0.0213114	-0.270995	-0.662937	-0.689787	-0.157213	-0.174118	-1.11334	-0.355197	-0.355549	-1.06384
	11.5	0.00196191	1.82395	2.03718	0.643695	0.77684	1.28142	2.58826	1.86519	5.2233	4.70534	4.94974	4.20289	7.28842	1.80266	1.43399	-1.08935	-0.362145	-0.779258	-0.912173	-0.551131	-0.387865	-0.918519	0.132565	-0.566445	-0.173877	0.40807	0.512569	-2.03719	0.394329	-0.906664	-0.288011	0.40671	-0.146986	-0.288329	-0.331414	-0.554894	-0.346068	0.0916658	0.0954369	-1.06602	-0.426185	-0.381376	0.43211	-0.0540786	-1.11225	-0.463292	-0.27722	-0.6156
	12	0.362638	1.74601	2.25434	0.613283	0.682911	0.989885	2.42652	1.95786	5.22767	4.20169	5.07687	3.95825	7.96101	2.2205	1.81929	-0.57781	0.0075023	-0.311913	-1.04431	-0.565281	-0.65152	-1.46086	-0.246421	-1.20211	-0.523733	0.345791	0.301814	-2.27228	-0.123398	-1.03087	-0.15727	0.800737	0.0650405	-0.37516	-0.146916	-1.08239	-0.737264	0.431719	-0.168293	-1.51206	-0.43309	-0.0581463	0.90435	0.167034	-0.458741	-0.569796	-0.211906	-0.00946429
	12.5	0.773766	1.34443	2.4606	0.48812	0.682046	0.971893	2.5701	1.20157	5.9702	3.88995	5.03382	3.44986	7.54381	2.43429	1.73328	-0.439366	-0.024707	-0.291097	-0.341844	-0.542262	-0.487064	-1.19731	-0.315269	-1.00922	-0.249289	0.200275	0.344237	-0.615441	-0.149847	-0.442592	-0.184041	0.456127	0.0285777	-0.598524	-0.136604	-0.703591	-0.974853	0.924243	-0.481267	-1.77221	-0.146315	-0.400658	1.24152	0.396971	-0.160631	-0.362825	-0.514768	-0.0282862
	13	1.03732	0.586751	2.30429	0.718106	0.641116	1.05064	2.51675	1.09351	6.8025	3.65909	4.45824	3.06191	7.04708	2.6292	1.62686	-0.25596	-0.422138	0.335433	-0.218634	-0.536096	-0.116548	-0.321443	-0.730689	-0.692121	-0.113812	0.0912874	0.505507	1.18789	0.244361	-0.288754	-0.714047	0.337375	0.126245	-0.286874	-0.25118	-0.0640684	-0.949591	1.29533	-0.64074	-2.09996	-0.103761	-0.568544	0.627416	0.383867	-0.595844	0.145895	-0.609744	0.0214029
	13.5	1.23361	0.590646	2.27284	1.00406	0.525973	0.903051	1.95954	1.37216	7.88225	3.26596	3.77856	2.99224	6.8686	2.33562	1.91352	0.203128	-0.52007	0.444591	-0.547931	-0.60201	-0.251178	-0.355227	-0.842364	-0.466575	-0.0448788	0.1617	0.172364	1.20848	0.16379	-0.204292	-0.442075	0.4961	0.406986	0.333096	-0.35689	-0.139834	-1.00748	0.955163	-0.64327	-2.00481	-0.340121	-0.269008	-0.611656	0.0661436	-0.645509	0.169537	-0.390145	0.452915
	14	1.24525	1.03973	2.4752	1.33334	0.505791	0.925979	1.74862	0.821337	8.91074	3.11487	3.17484	2.85731	6.42622	1.79374	1.90168	0.391479	-0.686661	-0.304506	-0.126862	-0.486975	-0.0416804	-0.072626	-0.311623	-0.0501351	0.285739	0.226524	-0.098845	1.2558	0.250133	0.482561	0.111806	0.222587	0.389534	0.80931	-0.66021	0.029092	-0.608121	-0.062697	-0.770222	-1.03759	-0.0585781	-0.0178452	-0.985615	-0.0721596	-0.520731	-0.395448	-0.26816	0.458217
	14.5	1.07067	0.94196	2.47245	1.35077	0.570908	1.00587	1.84926	0.626501	9.2428	3.11152	2.57623	2.48645	5.97946	1.7017	1.63845	0.196043	-0.94009	-0.286899	0.215729	-0.633665	0.0994294	0.905958	0.0709343	0.358331	0.499205	-0.0152452	0.125433	1.2142	0.707967	0.922233	0.138583	-0.0498454	0.288896	1.02044	-0.913315	0.629189	-0.0619319	-0.586133	-0.754888	-0.191635	0.6156	0.393866	-1.06151	-0.305226	-0.873754	-0.397445	-0.218322	0.0720826
	15	0.720392	0.875749	2.62745	1.29125	0.723848	0.746872	1.78539	0.867938	8.9824	2.86866	2.17532	2.45917	6.21365	1.90434	1.99794	0.0338823	-1.0231	-0.0706513	-0.317077	-0.647207	-0.213937	0.926467	0.0470124	0.557337	0.297776	-0.069649	0.00530411	0.917701	0.702457	0.652122	0.0419948	-0.065168	0.151883	0.970421	-0.664973	0.849848	-0.072569	-0.627592	-0.456052	0.508531	0.567915	0.913103	-1.70096	-0.865903	-1.15896	-0.194555	-0.0805385	0.224342
	15.5	0.765684	0.97834	3.2831	1.57423	0.860154	0.692586	1.79997	0.665496	8.45099	2.71992	2.11045	2.70314	6.54687	2.13328	2.45388	-0.0525885	-1.12445	-0.829472	-0.507934	-0.25662	-0.357616	-0.0832907	0.482936	0.515198	0.168351	-0.187579	-0.283008	0.801934	0.307472	0.852277	0.024972	-0.208565	-0.0428103	0.758741	-0.212977	0.597796	0.12266	-0.709593	-0.389827	0.866259	0.168543	0.757992	-1.40577	-0.916348	-0.476152	-0.659012	-0.0563315	0.303789
	16	0.645139	0.816012	3.35153	1.3238	0.920309	0.812008	1.97467	0.526714	7.97862	2.92302	2.17354	2.25245	6.38424	2.39729	2.39906	-0.583991	-1.02947	-0.940347	-0.575462	-0.0775995	-0.277706	0.101021	0.819424	0.438383	-0.00740028	-0.63753	-0.0109951	1.08667	0.265698	0.795301	-0.18758	-0.243377	-0.0572139	0.0911512	0.114192	0.694493	0.722484	-0.771524	-0.685471	0.89028	0.1843	0.366154	-0.349791	-0.811411	0.132724	-0.761387	-0.021524	0.0468165
	16.5	0.317105	0.513179	2.85009	0.494563	1.03002	0.7251	2.05022	0.883344	7.69531	2.84486	2.47094	1.75079	5.75897	2.59743	1.7951	-1.18688	-0.55798	-0.303578	-1.07236	-0.317939	-0.496424	0.360493	0.367474	0.465123	-0.0856805	-0.767899	0.394146	1.12866	0.105981	0.0788178	-0.40764	-0.132966	-0.0370974	-0.524468	0.665651	0.850097	0.689675	-0.122473	-0.459801	0.746281	0.0509228	0.160901	0.074713	-1.22254	0.426628	-0.0671588	0.0853242	0.0450326
	17	0.612169	0.408551	2.62384	0.40756	1.02453	0.938953	1.67494	0.814204	7.34137	2.80944	2.56018	1.71166	5.24985	2.43358	1.44198	-1.31468	-0.185096	-0.360656	-1.13277	-0.0482906	-0.25052	-0.219592	0.160182	0.388964	-0.203531	-0.368006	0.710555	1.27216	-0.495806	-0.241506	-0.749395	-0.0186133	-0.365792	-0.661589	0.977389	0.563542	0.235774	0.383464	-0.314807	0.644993	-0.534201	-0.282754	0.380719	-0.929904	0.961069	0.0260228	0.0783191	0.270287
	17.5	0.932792	0.487098	2.411	0.653142	0.952084	1.16343	1.19279	0.897073	7.25239	2.90204	2.19857	1.19745	4.55243	1.84397	0.881141	-0.950944	0.0335453	-0.30409	-0.975386	0.518594	-0.0821497	-0.373237	0.409088	-0.0815244	-0.304639	-0.0877542	0.825288	0.978079	-0.783558	-0.344812	-0.356773	0.16276	-0.0100589	-0.598081	0.719647	0.0418145	0.265698	-0.229817	-0.366198	0.470353	-0.729691	-0.519533	0.837568	-0.294134	1.59886	-0.495816	0.37569	0.451589
	18	0.811196	0.779757	1.8434	0.435005	0.785649	0.576664	0.957427	1.08859	7.37523	2.67412	2.21397	0.704998	3.59397	1.32286	0.306021	-0.851492	0.541419	0.420539	-0.713451	0.334819	-0.557184	0.236458	0.13388	-0.457021	-0.707744	-0.134065	0.530218	0.03645	-0.684999	-0.638326	0.172887	0.486368	0.643377	-0.46521	0.303834	-0.144525	-0.253134	-0.977098	-0.11484	0.392806	-0.397388	-0.452041	0.709186	-0.354686	1.40278	-0.289437	0.519517	0.333445
	18.5	0.946408	0.891448	1.43521	0.343503	0.845469	0.302314	0.903874	0.777487	6.91804	2.09704	2.24407	1.06541	3.25028	1.28579	0.250009	-0.301369	0.934701	0.636267	-0.177706	-0.0345975	-0.63951	0.220237	-0.358086	-0.327424	-0.897637	-0.0408976	0.0278562	-0.377011	-0.545981	-0.688138	-0.0510263	0.658059	0.244511	0.0462194	0.146342	-0.119198	-0.935884	-0.938695	0.114639	0.461829	-0.547729	-0.654632	0.370009	-0.246687	0.772657	0.14439	0.020651	0.0283738
	19	1.04457	0.933001	1.12339	0.760571	0.803619	0.325179	0.849005	0.474928	6.31956	1.78897	1.77038	1.11522	3.45945	1.34759	0.872721	0.509351	0.937995	0.40188	0.128869	0.21656	-0.599198	-0.0909848	-0.44557	-0.227751	-0.740514	-0.119883	-0.296373	-0.247734	-0.375635	-0.283974	0.0467985	0.639698	0.141358	0.358755	0.0749831	0.0557032	-0.721409	-0.968841	0.0170946	0.297435	-0.902583	-0.894021	0.247073	0.367326	0.314411	0.293584	-0.445818	0.039026
	19.5	0.328619	1.25945	0.881798	0.878134	0.884213	-0.209824	1.14816	0.44748	6.301	1.50806	1.84502	0.835072	3.44043	1.26086	1.50415	0.829548	0.679033	0.409569	0.0295179	0.145933	-0.801726	0.162621	-0.570513	-0.236707	-0.65782	-0.248951	-0.543575	-0.270654	0.127386	-0.191804	0.862547	0.294561	0.678442	0.237813	-0.108391	0.390069	-0.514544	-1.03022	0.0475308	0.0700863	-0.742103	-0.633414	0.143637	0.395078	-0.31947	0.506187	-0.656032	0.214756
	20	0.00941706	1.14592	0.748214	0.570516	1.05655	-0.530623	1.59032	-0.0549412	6.07788	1.1443	2.44447	0.870873	3.29169	1.47022	1.7113	0.88181	0.233374	0.245965	0.336011	-0.380455	-0.481794	0.237327	-1.1193	-0.191315	-0.634625	-0.234396	-0.523612	-0.692225	0.444517	-0.215101	0.507782	-0.230122	0.146782	0.204927	-0.23366	0.514705	-0.572746	-0.412521	0.0181377	-0.0582299	-0.222102	-0.277743	-0.0291002	0.159908	-0.630574	0.677835	-0.980185	0.0447771
	20.5	-6.79435e-05	0.66527	0.728235	0.868491	1.18503	-0.0284181	1.72597	-0.550716	5.53754	0.952387	2.08885	0.754138	3.47611	1.65165	1.7494	1.0836	-0.15405	-0.233893	0.484885	-0.391115	0.287328	0.0343278	-1.23541	0.0646196	-0.382252	-0.0854661	-0.298707	-0.553202	0.30676	-0.0734691	-0.0558355	-0.7216	-0.676844	-0.0855791	-0.1696	0.315629	-0.0769436	0.413125	0.12594	-0.0658074	-0.155649	-0.22783	-0.104812	0.343235	-0.574951	0.433863	-1.19585	-0.0558306
	21	-0.253656	0.415167	1.06665	1.11175	1.20262	0.388595	1.64213	-0.176157	5.53412	0.93859	1.1677	0.506827	3.53057	1.33471	1.97202	1.00455	-0.478367	-0.643639	0.105419	-0.301788	0.403836	-0.199983	-1.04049	-0.0938655	-0.00898861	0.164772	-0.170574	-0.25197	-0.0769793	0.271432	0.089437	-1.23802	-0.496441	-0.58177	-0.41896	-0.181725	0.272571	0.771422	0.396391	-0.241879	-0.0748035	-0.0821229	-0.0595029	0.555196	-0.642242	-0.0300742	-1.08527	0.179244
	21.5	-0.324167	0.319158	1.53384	0.619342	1.33415	0.450775	1.41659	0.272744	5.63383	1.03633	1.07188	0.657189	3.13515	1.02726	1.80037	0.497459	-1.02406	-0.697098	0.0290944	-0.46322	0.344542	-0.336012	-1.00635	-0.564152	0.0302155	0.414427	-0.206803	-0.589899	-0.311874	0.377462	-0.321333	-1.28144	-0.461451	-0.88122	-0.971744	-0.897132	-0.0730838	0.838141	0.413279	-0.377197	0.142066	-0.0290856	-0.114589	0.326277	-0.939472	-0.5918	-0.993414	0.0659219
	22	0.000192518	0.087138	1.41642	0.360042	1.08972	0.821585	1.26794	0.345164	5.21301	0.845009	0.707014	0.711188	2.79944	0.942732	1.02769	0.382906	-1.47677	-0.464067	0.101988	-0.356124	0.302835	-0.637761	-1.13205	-0.735693	-0.0200163	0.215415	-0.148247	-0.712169	-0.527836	0.477128	-1.00006	-0.860644	-0.699868	-1.01179	-0.955527	-1.53721	0.145712	0.720724	0.52985	-0.252062	0.113025	-0.385118	-0.0289861	-0.0857812	-0.864524	-1.01749	-0.750277	-0.46781
	22.5	0.0689351	0.266672	1.20132	0.44955	0.59345	1.05549	0.829245	0.912409	5.06149	0.564453	-0.417141	0.798942	3.00967	0.652454	0.805304	0.211642	-1.05231	-0.371227	-0.319235	-0.345417	0.160278	-1.02701	-1.03614	-0.603177	-0.0497018	-0.0810596	-0.403765	0.023625	-0.640764	0.628786	-0.946611	-0.450789	-0.461456	-1.30472	-0.694048	-1.54186	0.677119	0.722655	0.586344	-0.344364	-0.374961	-0.70874	0.036698	-0.052673	-0.956433	-0.699549	-0.626093	-0.590622
	23	-0.0630884	0.684953	1.30349	-0.19531	0.356817	0.787402	0.330227	1.58471	5.50437	0.598802	-0.765296	0.827654	2.736	0.67401	0.967575	-0.163857	-0.899559	-0.143401	-0.559033	-0.334284	-0.148748	-1.61477	-1.00013	-0.560058	0.0297427	-0.121793	-0.377863	0.378042	-0.443288	0.338334	-0.645201	-0.281662	-0.216297	-1.50618	-0.898898	-1.71477	0.727461	0.60407	0.160854	-0.225549	-0.631233	-0.913156	-0.322832	-0.0625293	-1.14398	-0.561079	-0.602034	-0.486089
	23.5	-0.243236	0.787748	0.972293	-0.388732	0.0586243	0.449401	0.163789	1.06561	5.58578	0.905614	0.0912113	0.608839	2.0776	0.941166	0.295896	-0.314125	-0.991724	0.372417	-0.401755	-0.0554179	-0.442543	-1.69847	-1.32628	-0.331515	-0.195732	-0.452342	0.0436934	0.29517	-0.219138	0.0027588	-0.354751	-0.120298	-0.160342	-1.05778	-0.896805	-1.54185	0.415984	0.128613	-0.0589543	0.14033	-0.592486	-0.904185	-0.635279	-0.551196	-0.549516	-0.762304	-0.376389	-0.657591
	24	-0.0201783	0.754483	0.721452	0.339381	0.137824	0.258998	0.100624	0.188687	5.34716	0.973212	0.242233	0.460478	1.97532	0.744535	-0.295212	-0.143373	-0.46119	0.180864	-0.697642	-0.129857	-0.256728	-1.76361	-1.07685	0.0602423	-0.595399	-0.854226	-0.0326302	0.707678	-0.0582071	-0.177691	0.100714	-0.325402	-0.0417038	-0.430705	-0.447727	-0.963506	0.281889	-0.228443	0.0910533	0.118973	-0.636437	-0.478316	-0.726765	-0.614635	0.134364	-0.541415	-0.129565	-0.802384
	24.5	0.38315	0.809492	1.18576	0.631523	0.242511	0.23694	0.00846068	-0.0828441	5.30512	1.22874	-0.255575	0.327102	2.06763	0.67339	0.0147118	-0.167888	0.18581	-0.478021	-1.02261	-0.21943	-0.270184	-1.94821	-0.38773	0.0697569	-0.794579	-0.806152	-0.132443	0.578299	0.0230364	-0.293068	0.211471	-0.665523	-0.0866085	-0.418321	-0.699742	-0.646453	0.0640234	-0.146121	-0.262911	-3.84224e-05	-0.784159	-0.0583483	-0.860246	-0.419042	0.0849316	-0.394325	-0.135703	-0.529913
	25	0.62415	0.951574	1.24104	0.669982	0.36518	0.387261	0.186637	-0.427056	5.47155	1.71611	-0.179939	0.237813	1.53906	0.885364	-0.153804	-0.356328	0.182844	-0.782096	-0.878338	0.217046	-0.716521	-1.66096	-0.0844688	0.0568399	-0.447005	-0.767624	0.161621	-0.186422	0.110727	-0.314963	0.28727	-0.841072	-0.157898	-0.30717	-1.11297	-0.731145	-0.244698	-0.326868	-0.407905	-0.0964902	-0.693172	-0.00588207	-0.745026	-0.897743	-0.0720294	-0.849668	0.0157266	-0.588939
	25.5	0.961158	1.01374	0.983327	1.11973	0.696689	0.611811	0.602405	-0.619323	5.02537	1.52985	-0.180061	0.271166	1.30849	0.831914	-0.620996	-0.347949	0.340789	-0.902599	-0.77947	0.363671	-0.601485	-0.822013	0.012305	-0.122663	-0.238283	-0.753806	0.129063	-0.543219	-0.139773	-0.167368	0.240244	-0.840468	0.0974182	0.247315	-0.833546	-0.202058	-0.253541	-0.581309	-0.041308	-0.528483	-0.319115	0.439479	-0.137605	-1.09823	-0.159838	-0.63187	0.314575	-0.838481
	26	1.49097	0.876006	1.29448	1.04417	0.804093	0.55784	0.796345	-0.112994	4.26336	0.854424	-1.01197	-0.0610746	1.44837	0.787452	-0.278037	-0.338439	0.459951	-1.15246	-0.678064	0.34779	-0.175888	-0.321988	0.0405052	-0.354522	-0.140177	-0.576572	-0.211666	-0.899278	-0.236201	-0.257046	0.145823	-0.589484	0.342468	-0.220214	-0.54674	0.153902	0.1899	-0.219941	0.0791753	-0.778404	-0.041626	0.705284	0.0425556	-0.503303	-0.87548	-0.0459305	0.489828	-0.981728
	26.5	1.5925	0.425969	1.5124	0.422583	0.14803	0.642646	0.945587	0.684653	4.05582	0.188276	-1.87625	-0.437685	1.37814	1.06123	0.152272	-0.494854	0.19221	-0.899932	-0.0586452	0.757343	-0.408619	0.0153213	-0.27493	-0.356174	0.483792	-0.523022	0.215256	-1.16395	-0.195543	-0.491876	0.150433	-0.227148	0.34642	-1.15972	-0.60326	-0.226685	0.628525	0.309421	-0.2834	-0.600046	0.12677	0.13871	-0.0645603	-0.260439	-1.20275	-0.136957	0.693887	-1.03626
	27	1.10555	0.179699	1.20049	0.213667	-0.296471	0.328919	0.80457	0.984994	4.16081	-0.468338	-2.03745	-0.33406	1.00579	0.989831	-0.0624694	-0.712126	0.109841	-0.537322	0.470775	0.488707	-0.354018	0.561284	-0.846432	-0.313649	1.01276	-0.608105	0.250941	-0.725352	-0.434326	-0.901412	0.321959	-0.191164	0.180415	-0.735994	-0.178298	-0.484352	0.613826	0.105265	-0.136738	-0.753738	0.471439	-0.248887	-0.246626	-0.135583	-0.824785	0.123692	0.363519	-1.03293
	27.5	0.657695	-0.180098	1.54151	0.0817035	-0.599613	-0.0689966	0.503836	0.422068	3.82776	-1.26453	-2.015	-0.486409	0.950647	0.832821	0.00410098	-0.384716	-0.0874232	-0.307448	0.533773	-0.212568	0.0601889	0.819561	-1.06392	-0.41011	0.799358	-0.155631	-0.115013	-0.440275	-0.738214	-1.09071	0.322747	-0.0400966	0.0901698	-0.0162448	0.229337	-0.460297	0.280594	-0.192037	0.2767	-0.398365	0.55492	-0.255771	-0.538772	0.586899	-0.571255	0.717576	-0.0588226	-0.719467
	28	0.506761	-0.445585	2.06675	-0.265577	-1.15296	-0.0310633	0.230125	-0.182783	4.13269	-1.5479	-2.10473	-1.05861	0.93103	0.680353	0.0468721	-0.16744	-0.390207	-0.051267	0.504148	-0.535717	-0.312836	0.555255	-0.959493	-0.299454	0.607894	0.395038	0.0904904	-0.330386	-0.415914	-0.992066	0.444013	0.190678	-0.287658	0.0847827	0.265215	-0.602974	0.0504761	0.0599073	0.243463	0.220049	0.124473	-0.519155	-0.617305	1.09525	-0.117389	0.764847	-0.259756	-0.205387
	28.5	0.327246	0.0387948	2.05969	-0.19786	-1.14084	0.169534	-0.165262	-0.314148	5.38467	-1.40138	-2.28709	-0.8809	0.657928	0.56347	0.0488998	-0.290709	-0.392199	0.208474	0.621768	-0.903225	-0.72187	0.329509	-0.267277	-0.224022	0.759384	0.797706	0.371586	0.522237	-0.0837651	-0.731007	0.386744	0.27631	-0.608021	0.550034	0.414407	-0.77235	0.12867	-0.169117	0.328576	0.439171	-0.167832	-0.653364	-0.471091	1.00808	0.784595	0.769145	-0.662429	0.650125
	29	0.250986	0.884741	2.27707	-0.14102	-0.952934	0.294087	-0.692855	-0.92933	6.14516	-1.26207	-2.13538	-0.751654	0.44093	0.335395	0.077349	-0.00909118	-0.334347	0.491773	0.649939	-1.19843	-0.364598	0.487995	0.333859	-0.177918	0.504537	1.3317	-0.178729	0.762133	-0.386209	-0.192356	0.136033	0.158501	-0.655597	1.1152	0.550593	-0.0993203	-0.0852246	-0.563399	0.789461	0.688768	-0.0991454	-0.255882	-0.3755	0.925339	1.10965	0.858687	-1.18098	1.16966
	29.5	0.821742	1.19018	3.06622	-0.0146487	-0.770274	0.87215	-0.823654	-1.38828	6.72124	-0.898196	-2.10581	-1.28452	0.387078	0.252551	0.0571865	0.142306	-0.433742	0.754201	0.734268	-0.604821	-0.279049	0.567088	0.850052	0.116008	0.476919	1.97093	-0.433187	0.327516	-0.174887	0.821548	0.12558	0.474026	-0.357904	0.978311	0.55261	0.739696	0.0471806	-0.0317868	1.06615	1.0729	-0.29554	0.00956836	-0.020428	0.965842	1.12989	0.615366	-0.798414	1.17806
	30	1.08423	1.20954	3.42777	0.153652	-0.0796213	1.13691	-0.657193	-0.397192	7.45772	-0.689105	-2.36617	-1.6207	-0.112291	0.478465	0.0328068	-0.409256	-0.264633	0.859246	0.809127	0.0431869	-0.544211	0.703544	1.26842	0.310077	0.77253	1.52111	-0.00900275	0.50479	0.39107	1.38626	0.231998	0.685833	-0.260838	0.405337	0.824658	1.10712	0.420342	0.597764	0.873517	0.964625	-0.183588	0.19547	0.542121	0.50607	1.19285	0.383756	-0.109236	1.47358
	30.5	0.657772	0.995367	3.49467	0.0763709	0.470078	0.5721	-0.81065	0.325039	7.44433	-1.29936	-2.67112	-1.4484	-0.526106	0.554447	0.00353816	-0.586131	-0.168428	0.818349	0.666655	0.269625	0.150282	0.761975	1.22226	0.472747	0.937944	0.239739	-0.075086	0.709282	0.393112	1.31331	0.055422	0.50297	-0.0253185	-0.234932	1.28159	1.20529	0.616407	0.388552	0.635589	0.75949	0.427187	0.52214	0.45609	-0.171675	0.502298	-0.00502686	0.172988	1.56643
	31	0.461505	0.523726	4.01805	-0.0122518	0.211069	-0.0720693	-1.1005	-0.155782	6.73318	-2.13156	-2.72623	-1.99033	-0.554873	0.110117	-0.495091	-0.409734	-0.23275	0.660253	0.204926	0.593131	0.909041	0.72255	0.843257	0.668193	0.899096	-0.673483	-0.34462	-0.0132942	0.124889	1.29076	-0.24284	0.394734	0.0916811	-0.257719	1.0905	1.40985	0.343738	0.462105	0.0896658	0.807074	0.563725	0.492471	0.404265	-0.531434	-0.224754	-0.660657	0.412635	0.933398
	31.5	0.439322	0.266779	4.26234	-0.203022	0.254058	-0.910164	-1.09028	-0.0776646	6.42836	-3.01642	-2.8758	-2.94731	-1.07815	-0.0921818	-1.12583	-0.435229	-0.225821	0.202277	-0.23384	0.654234	0.599135	0.497826	0.309021	0.620931	0.79637	-1.22925	-0.0229291	-0.575978	0.690918	0.932311	-0.318638	0.778657	-0.130477	0.189989	0.660888	0.789046	0.230907	0.717428	-0.275048	0.751178	0.50077	0.356655	0.667349	-0.437107	-0.324397	-0.731754	0.929442	0.635086
	32	-0.17322	0.0504728	3.96032	-0.909892	0.364296	-1.98885	-1.21635	0.140467	5.93946	-4.29685	-3.24397	-3.6552	-1.65963	-0.348248	-1.44576	-0.0480059	-0.224314	-0.16536	-0.432837	0.330315	0.533288	0.308087	0.0688229	0.573815	0.473965	-1.88239	0.768109	-0.386199	0.961261	0.105755	-0.173118	0.977359	-0.0708805	0.342503	0.378994	-0.0140206	0.239058	0.519406	-0.153679	0.637111	0.780844	0.558767	0.486104	-0.242849	-0.660541	-0.703436	1.30779	0.70062
	32.5	-0.261792	-0.0281407	4.0081	-1.67392	-0.421345	-2.56778	-1.80581	-1.01082	5.33977	-5.38202	-3.62455	-4.84201	-1.60478	-1.20065	-1.72463	0.472366	-0.487332	-0.302488	-0.511443	0.033895	0.686631	0.100227	-0.0876898	0.572417	0.13495	-1.73879	0.855119	-0.474543	0.56381	-0.345201	-0.100778	0.652187	0.321039	0.567353	0.00170505	-0.063966	0.300365	0.0620059	-0.0509412	0.613349	0.564259	0.455012	-0.0670046	0.234006	-0.767027	-0.966677	0.833686	0.160386
	33	0.551923	0.117504	4.4693	-1.8979	-1.01783	-2.39568	-2.33343	-2.06312	5.16194	-5.69717	-4.0099	-6.05903	-1.66157	-1.87982	-1.75642	0.520068	-0.526329	-0.598215	-0.408524	-0.0373418	0.13007	0.107318	-0.383857	0.292266	-0.148722	-0.399032	0.733561	-0.653694	0.493231	-0.0606163	-0.106786	0.615471	0.493073	1.0736	-0.433461	0.380448	0.11363	-0.0181055	0.111404	0.491255	0.0252235	0.230772	0.00857644	0.786998	-0.100643	-0.617669	0.436951	-0.0496953
	33.5	0.560563	-0.00672716	5.19744	-2.40957	-0.822126	-2.30343	-2.54281	-2.10104	5.27303	-5.81286	-4.59188	-6.74934	-2.40003	-2.10379	-1.57657	0.49669	-0.28457	-0.824974	-0.16076	0.0640282	-0.0178615	0.13751	-0.517373	0.182977	-0.213838	0.465075	0.874001	-0.231738	0.728768	0.037305	0.210799	0.578238	0.464408	0.877071	-0.313701	0.390538	-0.127369	0.0689971	0.431658	-0.0850054	0.0764992	0.510115	0.199527	0.90993	0.149388	0.126097	0.634356	0.120953
	34	-0.119255	-0.696265	6.23733	-2.53943	-1.11965	-2.14536	-3.08385	-2.55829	5.34872	-6.13503	-5.50618	-7.47236	-2.77626	-2.43569	-1.50873	0.163955	-0.168224	-0.545078	-0.0392953	0.189596	0.546939	0.162837	-0.0819344	0.388701	0.136964	0.674841	0.851987	0.400881	0.487527	0.284124	0.397727	0.00245504	0.803907	0.245601	0.171327	0.636164	0.11411	0.131059	0.426438	-0.534951	-0.161935	0.754737	0.0653541	0.714456	0.0716896	0.270891	0.345973	0.238354
	34.5	-0.190821	-1.01553	7.23942	-2.30427	-1.80094	-1.88402	-4.02145	-3.5268	5.43975	-6.51006	-6.54561	-8.25221	-3.26159	-2.78361	-1.78112	-0.350772	-0.0383719	-0.152884	-0.238537	0.13584	0.651112	0.20451	-0.0737251	0.19849	0.274121	1.04389	0.208889	0.425815	0.276975	0.624195	0.0462672	-0.486829	0.60539	-0.293761	0.305235	1.16361	0.156601	0.0732147	-0.118974	-0.427612	-0.543116	0.474469	0.303677	0.196922	0.176605	0.266344	-0.283211	0.213877
	35	-0.543639	-1.35813	7.79956	-2.44767	-1.81421	-2.01065	-4.74091	-3.70051	5.93916	-7.30586	-7.79629	-8.49521	-4.24945	-3.00912	-2.2281	-0.15849	0.283845	0.254733	-0.395921	0.220861	0.830015	0.0469864	-0.313549	0.0153993	0.113922	1.12901	0.0305046	0.7392	0.433475	0.62333	-0.115931	-0.241443	0.184986	-0.808188	0.42877	0.755254	0.0899481	0.263551	-0.378706	-0.598154	-0.417149	0.181298	0.655625	-0.448853	0.226637	0.46485	-0.177907	0.0323351
	35.5	-1.85361	-2.14004	7.7591	-2.94069	-2.38831	-2.44742	-5.42024	-3.85728	6.72518	-8.65537	-9.11295	-9.33045	-5.62457	-3.21467	-2.91623	0.157417	0.320038	0.717005	-0.448536	0.276046	1.03399	0.20433	-0.0719314	0.235626	0.0714874	0.293293	0.306758	1.10582	0.26642	0.369837	0.112354	-0.283042	0.104128	-0.904966	0.391121	-0.265239	0.223776	0.541438	-0.476029	-0.808152	-0.388414	-0.0611254	0.322421	-0.936105	0.196785	0.271404	0.217874	-0.0747724
	36	-2.54622	-2.75883	6.61115	-3.23928	-3.69471	-2.66299	-6.26772	-4.73368	7.7199	-10.4405	-10.4845	-10.5932	-6.66565	-3.29981	-3.62201	0.326047	0.114523	0.775329	-0.439523	0.0752505	0.317657	0.469153	0.211328	-0.0614928	-0.251247	-0.17333	-0.0652292	0.784299	0.051893	0.191146	0.122117	-0.482804	0.113992	-0.90504	0.018724	-0.751671	0.23285	0.392506	-0.378856	-0.494921	-0.682144	-0.147846	-0.132788	-0.945618	0.15801	0.0358914	0.0567307	-0.0610844
	36.5	-2.57324	-2.84891	5.07761	-3.69372	-4.52641	-2.8599	-6.74853	-5.4359	8.47927	-11.8149	-11.4762	-11.6501	-7.60577	-3.38455	-4.36264	0.980306	0.143296	0.54172	-0.202836	-0.212943	-0.517767	0.218933	0.0616533	-0.689967	-0.873225	-0.219053	-0.172743	0.742466	0.0409556	-0.024254	0.282245	-0.143111	-0.0413776	-0.696101	-0.0543931	-0.897389	-0.206424	0.0440757	-0.115362	-0.371586	-0.340514	-0.147278	-0.279221	-0.895709	-0.0328531	0.230488	-0.0331013	-0.256501
	37	-2.83472	-3.17423	3.97635	-4.60879	-5.00054	-3.72134	-6.9578	-5.64607	8.94403	-13.3032	-11.9362	-12.9823	-8.70627	-3.28714	-4.70462	1.35533	0.0118828	0.228586	0.089462	-0.0385433	-0.631782	-0.276573	-0.010645	-0.551699	-0.954444	-0.343302	0.0731645	0.917669	-0.0631726	-0.320494	0.5407	-0.0167308	0.275502	0.0401942	0.277872	-1.33195	-0.588846	-0.133429	-0.0239134	-0.688023	-0.0792141	-0.358227	-0.681319	-0.951731	0.229213	0.241019	0.170469	-0.246213
	37.5	-3.24089	-3.48747	2.89794	-5.17333	-5.77423	-4.85997	-7.50882	-6.05584	9.07877	-14.6287	-12.5024	-14.5342	-9.9969	-3.3021	-4.95309	0.600072	-0.144555	-0.411854	0.486176	0.062022	-0.737187	-0.459614	0.464385	-0.405224	-0.542666	-0.11083	-0.259636	0.210305	-0.224383	-0.397747	0.506015	-0.33503	0.509176	0.593996	0.178926	-0.83711	-0.911021	-0.359375	0.108004	-0.369755	-0.0815776	-0.267244	-0.99922	-0.585352	0.00539282	-0.0379803	0.340637	0.132908
	38	-3.27236	-3.17439	2.08931	-5.565	-6.34586	-5.97255	-8.13009	-6.82127	8.6838	-15.787	-13.6253	-15.9214	-10.7001	-3.68762	-5.39731	-0.0738881	-0.129814	-0.82999	0.919091	0.267452	-0.819132	-0.936359	0.757449	-0.567586	-0.168394	0.312532	-0.739072	0.0476323	-0.0554003	-0.332224	0.469364	-0.104508	0.022927	0.501974	0.183502	0.0211448	-1.06957	-0.538282	0.327757	0.0669819	0.330222	-0.00362543	-0.442178	-0.0559404	-0.394428	0.0764069	0.179321	0.0730036
	38.5	-3.40435	-3.553	1.80108	-6.43678	-6.67279	-7.55932	-9.19966	-7.40688	7.31382	-17.5972	-14.975	-17.7375	-11.2463	-4.27346	-6.17396	-0.528037	-0.283938	-0.550732	1.16582	0.497399	-0.30103	-1.27839	0.569945	-0.20329	0.259662	0.430283	-0.245172	0.501114	-0.0499068	-0.286963	0.391975	0.242796	-0.149666	0.5123	0.573029	0.382107	-0.740602	-0.173689	0.257041	0.297784	0.960801	-0.377969	0.228758	-0.100346	0.0305064	4.20699e-05	0.278616	-0.0706746
	39	-4.27897	-4.72652	1.27306	-7.59667	-7.08964	-9.55526	-10.947	-8.01163	5.85706	-19.6526	-16.6034	-19.8386	-12.3463	-4.82718	-6.88385	-1.36581	-0.625429	-0.241704	0.982905	0.614096	0.0292532	-0.774141	0.463951	0.348895	0.589246	0.80506	-0.0364053	-0.034681	-0.432075	-0.216348	0.0777375	0.251259	-0.131236	0.338952	0.166708	0.426184	-0.19663	0.425569	0.256905	0.750184	0.841348	-0.963703	0.369883	-0.294594	0.228644	-0.528326	0.545117	-0.183188
	39.5	-5.37502	-5.81421	0.349084	-8.58045	-7.87598	-11.2217	-12.8686	-9.16445	4.7688	-21.4887	-18.8942	-21.7234	-13.103	-5.82432	-7.73606	-1.60018	-0.887181	-0.322781	0.58557	0.415188	-0.286589	-0.195335	0.524809	0.236957	0.485969	0.738298	-0.0929272	-0.433403	-0.449784	-0.0290839	-0.0192993	0.378775	-0.60661	-0.327614	-0.419896	0.426931	0.222875	0.569499	0.419391	0.949217	0.598294	-0.659464	0.484593	0.00034702	-0.26072	-0.391292	0.416382	-0.492618
	40	-6.0791	-6.72916	-0.379755	-9.61618	-9.15807	-12.4487	-14.8277	-10.6464	2.913	-23.8515	-21.0263	-23.8389	-13.5834	-6.63751	-8.62509	-0.840686	-1.07976	-0.142476	0.259388	0.258026	-0.372225	-0.0531157	0.124659	0.443348	0.0690204	-0.0743215	0.360287	0.168323	-0.301525	0.0828952	-0.0501232	0.575545	-0.660383	-0.797878	-0.405897	0.0370999	0.631308	0.659562	0.0961079	0.772955	0.693066	-0.0572461	0.612685	-0.0749764	0.108614	-0.107941	0.0832236	-0.606589
	40.5	-7.07008	-8.02468	-1.98936	-10.7973	-10.3111	-13.8517	-17.4641	-11.6845	0.76382	-26.2584	-22.6097	-25.9187	-14.4311	-6.89538	-9.22478	-0.134625	-1.37286	0.0106374	-0.0352987	0.0771686	-0.266482	0.218892	-0.111323	0.65468	-0.198645	-0.282117	0.668765	-0.165695	-0.534963	-0.105956	-0.495727	0.2863	0.0781845	-0.918225	-0.539438	-0.474812	0.559133	0.357911	-0.206044	0.822956	0.309276	-0.0798316	0.232937	-0.562527	0.608018	-0.517048	0.212204	-0.398727
	41	-8.47374	-8.61928	-4.50659	-11.8539	-11.3363	-15.1424	-20.0032	-12.7418	-0.428342	-27.5277	-23.7757	-27.3177	-15.3247	-7.24067	-9.48307	0.197853	-1.46263	-0.00642789	-0.291164	-0.142235	-0.331364	0.225321	-0.033756	0.341857	-0.292511	0.120012	0.45575	-0.704744	-0.465395	-0.426622	-0.520377	-0.0279998	0.212853	-0.64925	-0.69906	-0.499127	0.310326	-0.567277	-0.181842	0.73803	-0.567184	0.202353	-0.159209	-0.376062	0.0339486	-0.485816	0.250221	-0.307383
	41.5	-9.32913	-8.70597	-6.85463	-12.7033	-12.6252	-16.0338	-21.8968	-14.0779	-1.13087	-28.9032	-24.8923	-28.3281	-15.6693	-7.67255	-9.33641	0.637507	-1.32522	-0.051964	-0.43173	-0.081779	-0.125194	-0.316649	0.000626964	0.15812	-0.32106	-0.182123	0.0124662	-0.0404873	0.189107	-0.48014	-0.323788	-0.214061	0.0367522	-0.365323	-0.182612	-0.436149	0.306308	-1.19996	-0.411716	0.229791	-0.72931	1.07553	-0.231834	0.0134498	-0.0703211	-0.0331246	0.0677809	-0.0343228
	42	-10.3612	-9.20431	-9.47554	-13.2892	-13.8595	-16.8693	-23.7562	-14.959	-0.630415	-30.1843	-25.7862	-29.5011	-15.7933	-7.52703	-9.09692	0.610143	-1.07425	0.215795	0.0159605	-0.021986	0.0529085	-0.465906	-0.141372	0.151933	-0.195095	-0.0930487	-0.321675	0.370328	0.43242	-0.109404	-0.578677	-0.503467	0.203735	-0.478877	0.0613989	-0.189691	0.181598	-1.04136	-0.494943	0.350883	-0.719459	1.00009	-0.507797	-0.215604	0.295599	-0.356064	0.242384	0.396822
	42.5	-11.6888	-10.2463	-12.9349	-14.0413	-14.6807	-18.1753	-25.345	-15.579	3.28949	-30.3651	-26.1382	-30.513	-15.2046	-6.98787	-8.73629	0.104199	-0.871881	0.219666	0.209792	-0.251344	-0.144095	0.0412196	-0.224691	-0.382523	0.0213323	0.5848	-0.462221	-0.248915	0.260105	-0.277359	-0.418609	-0.493584	-0.0604139	-0.334312	-0.106244	0.0218214	-0.293839	-0.838986	-0.252448	0.49514	-1.37557	0.255708	-0.51372	-0.220252	-0.155671	-0.540053	0.156809	0.264921
	43	-12.4277	-11.3908	-15.6368	-14.9502	-15.3931	-19.5409	-25.5817	-16.5926	11.0325	-29.698	-25.7858	-30.7504	-14.0535	-6.3592	-8.23922	-0.247764	-0.480625	-0.0190036	-0.0455125	-0.741505	-0.305449	0.33828	-0.299278	-0.776021	0.0975113	0.426007	-0.34431	-0.196412	0.349403	-0.429178	-0.0129329	-0.153682	-0.487004	0.191548	-0.129498	0.251558	-0.262529	-0.168233	-0.0956598	0.0416223	-1.48386	0.419537	-0.295258	0.313844	-0.823144	0.00790209	-0.363856	-0.24126
	43.5	-12.8448	-12.4802	-17.1322	-15.5302	-16.1866	-20.4384	-25.0032	-17.3875	18.9161	-28.4528	-24.6934	-30.2971	-12.5296	-5.41146	-7.50228	-0.257311	-0.197804	-0.295226	-0.0877731	-0.940805	-0.362992	0.424696	-0.2724	-0.451924	-0.0962271	-0.314077	-0.198961	0.145656	0.558219	0.0414574	-0.25548	-0.0746729	-0.217494	-0.0144871	-0.2937	-0.081175	-0.131138	0.877823	0.0317154	-0.336478	-1.01109	0.566432	-0.49957	0.353163	-0.619302	-0.192216	-0.652333	-0.34374
	44	-13.5021	-13.4687	-18.6789	-16.1109	-16.8895	-21.196	-24.8619	-17.6635	24.6366	-26.1085	-22.8104	-29.1782	-10.5302	-4.3909	-6.49703	-0.206255	-0.1433	-0.705669	-0.10742	-1.00092	-0.343047	0.605508	-0.464692	-0.39699	-0.185997	-0.51265	0.252139	-0.643114	0.272256	0.0560977	-0.228162	-0.280579	-0.0107399	-0.173615	-0.620437	-0.0925508	-0.634574	1.02528	-0.192505	-0.309658	-0.779292	-0.0615022	-0.539622	0.209641	-0.325118	-0.497146	-0.546101	-0.309145
	44.5	-13.6855	-14.0679	-20.0804	-16.8739	-17.1123	-21.8827	-24.5715	-17.8637	27.7993	-22.7733	-19.8805	-26.6839	-8.36203	-3.32787	-5.00454	-0.00568006	0.0592494	-0.868593	-0.727007	-0.822695	0.0828021	0.472837	-0.526617	-0.343436	-0.0337581	-0.481472	0.512824	-0.990863	-0.422431	-0.68097	0.203851	-0.165685	-0.3787	0.671179	-0.683392	0.127664	-0.894182	0.522144	-0.560074	-0.752067	-0.35424	-0.046588	0.348272	0.751316	-0.363464	-0.377752	-0.631019	-0.485213
	45	-14.0157	-14.3194	-20.1997	-17.3756	-16.9846	-22.0603	-23.9625	-17.5883	25.3227	-18.8669	-16.5517	-23.0435	-6.2265	-2.24132	-3.25019	0.386182	0.170824	-0.56028	-1.14313	-0.388064	0.174403	-0.10222	-0.357197	-0.0423329	0.0461034	-0.535202	0.142238	-0.292726	-0.382842	-0.598833	-0.196566	-0.504446	-0.422841	0.929873	-0.567	-0.156888	-0.530366	0.167007	-0.597838	-0.97284	0.467006	0.213167	0.555864	0.896986	0.0395474	-0.474881	-0.488508	-0.258527
	45.5	-14.8569	-14.2111	-19.6379	-17.211	-16.7095	-21.7897	-23.6531	-16.5715	15.665	-14.6571	-13.0751	-19.3013	-3.57192	-1.32553	-1.31217	0.532285	-0.250333	-0.121067	-0.981028	0.308305	0.0763761	-0.671954	-0.424602	0.1639	-0.16598	-0.286086	-0.251737	-0.293274	-0.0627766	-0.3408	-0.572095	-0.991426	-0.385632	0.134685	-0.474242	-0.572076	-0.232945	-0.254673	-0.75123	-0.676073	0.636624	-0.531903	0.213346	0.364713	0.665331	-0.761949	-0.423611	-0.0141712
	46	-15.258	-14.0905	-19.2074	-17.0013	-16.0492	-21.3885	-23.2375	-15.1765	4.14853	-10.4283	-9.74149	-15.2788	-0.887818	-0.408124	0.633981	0.478742	-0.589477	-0.0600061	-1.00304	0.759281	-0.09743	-0.891028	-0.420334	-0.530011	-0.170701	-0.000361046	-0.481864	-0.672167	-0.63497	-0.883106	-0.625092	-0.870805	-0.963949	0.0262564	-0.322434	-0.438764	-0.478258	-0.898435	-1.21656	-0.272726	0.531384	-1.19432	0.452255	0.00292962	0.375723	-0.779602	-0.608835	0.0476951
	46.5	-15.5059	-14.0379	-18.2278	-16.4607	-15.0073	-20.8449	-21.7507	-13.5058	-4.87757	-6.32083	-6.38322	-11.0196	1.25083	0.976923	1.93032	0.355299	-0.71516	0.259727	-1.07519	0.610025	-0.585983	-0.652262	-0.107013	-1.06342	-0.119092	0.197319	-0.828049	-0.32594	-0.970491	-1.15625	-1.09667	-0.635411	-1.19758	-0.0390048	-0.192825	-0.418718	-0.537559	-0.992423	-0.704413	-0.0948928	0.495297	-1.18298	0.536201	-0.274955	-0.139782	-0.873756	-0.883797	0.0308208
	47	-15.7926	-13.7078	-16.4819	-15.0449	-14.0204	-19.7441	-19.493	-11.4625	-12.3294	-2.68178	-3.12742	-7.13156	3.10456	2.35589	2.51327	-0.084838	-1.21914	0.450033	-0.727348	0.120613	-0.956685	-0.644561	0.172113	-1.17909	-0.55636	-0.0844113	-1.0561	-0.654208	-0.37529	-0.922709	-1.36828	-0.61445	-0.416106	-0.796141	-0.376679	-0.928267	-0.449098	-0.818055	-0.00942723	-0.114368	0.0370855	-1.39283	-0.177229	-0.833236	-0.338574	-0.726917	-1.24605	-0.150012
	47.5	-15.0298	-13.0301	-15.2398	-13.2235	-12.772	-18.1334	-16.8778	-9.28484	-16.3506	0.569489	-0.441522	-3.94105	4.54439	3.2191	3.10226	-0.821762	-1.39822	0.304806	-0.223857	-0.178171	-0.628123	-1.00501	0.158828	-1.08117	-0.80093	-0.393855	-0.907789	-1.44865	-0.28639	-0.956514	-1.10888	-0.247707	-0.0356437	-1.02645	-0.732479	-0.788044	-0.7178	-0.782123	-0.0782839	-0.403582	-0.333044	-1.43788	-0.389646	-1.17079	-0.58806	-0.0520945	-1.14474	-0.332717
	48	-13.6521	-12.509	-14.7293	-11.5445	-11.1923	-16.5952	-13.9499	-7.28697	-15.6057	3.11662	1.84904	-1.30752	4.99639	3.93269	3.39942	-1.34512	-1.04523	0.191313	-0.239761	-0.787094	-0.419953	-0.862702	-0.0111863	-0.883833	-0.462619	-0.388709	-0.653032	-1.49373	-0.513769	-0.838573	-0.831027	0.00909145	-0.271382	-0.629425	-0.976667	-0.219509	-0.985789	-0.673358	-0.218705	-0.931711	-0.257128	-0.628675	-0.113373	-1.05892	-0.989925	0.142149	-0.656662	-0.20017
	48.5	-12.4542	-11.7643	-14.1366	-9.60529	-9.52394	-15.1872	-11.0764	-5.53068	-12.7563	4.72274	4.0334	0.398498	5.06887	4.68801	3.42418	-1.61916	-0.596683	0.212487	-0.470864	-1.4408	-0.409583	-0.427226	-0.420976	-0.165805	-0.338959	-0.323156	-0.411913	-1.12964	-0.107613	-0.195367	-0.100151	-0.300592	-0.0343196	-0.708228	-0.991353	-0.0219388	-0.564381	-0.381213	-0.134453	-1.49861	-0.316492	-0.123419	-0.265849	-0.843037	-0.586193	0.319241	-0.477166	-0.540103
	49	-10.6303	-10.7549	-13.5805	-7.65287	-7.6295	-13.4134	-8.78069	-3.67185	-10.3347	5.79384	5.72819	1.31785	5.25589	4.47502	3.88896	-1.8682	-0.0739872	-0.0563082	-0.209728	-1.27865	-0.0419271	-0.632333	-0.637125	0.529853	-0.517216	-0.351748	-0.191605	-0.911798	0.0569119	0.171841	0.544376	-0.518213	-0.0378712	-0.655519	-0.974978	-0.29345	-0.0979405	-0.480267	-0.492904	-1.70611	-0.742986	-0.188079	-0.484279	-0.703986	-0.0127565	0.524577	-0.380805	-0.941602
	49.5	-8.73719	-9.82212	-13.3649	-6.2619	-5.97291	-11.7047	-7.39228	-2.01352	-7.93907	6.60153	6.80767	1.6861	5.08622	3.93598	4.61003	-1.64458	0.311614	-0.296439	-0.0727361	-0.847854	0.0103143	-0.600316	-0.772876	0.423605	-0.335973	0.00607897	0.0609041	-0.337418	0.060716	0.239639	0.628566	-0.579053	-0.708743	-0.360701	-0.560135	-0.0788145	-0.0985672	-0.296668	-0.813883	-1.20473	-0.901671	-0.0594706	-0.636499	-0.376095	0.0113652	0.167688	0.00762113	-0.591857
	50	-7.6558	-8.9158	-12.9727	-4.95305	-4.72889	-10.6001	-6.62134	-1.03039	-5.97509	6.93037	7.88554	1.94378	4.84951	3.80757	4.966	-1.12195	0.143084	-0.318958	-0.505519	-0.737507	-0.35031	0.202159	-0.782197	0.139648	-0.23821	0.0340576	0.344025	0.316003	0.0393211	0.371861	0.911292	-0.549358	-0.856115	-0.345952	0.180172	-0.0703447	0.136659	0.205915	-0.720005	-0.822078	-0.900544	0.0466411	-0.656118	-0.00136046	0.103117	-0.497008	-0.199715	-0.531839
	50.5	-6.71923	-7.61485	-12.0956	-3.43147	-3.60537	-9.32883	-6.00288	-0.166199	-5.22996	7.22814	8.43475	2.34933	4.97774	3.7481	5.61859	-0.5954	0.273964	-0.525896	-0.406101	-0.195665	-0.483122	0.459819	-0.352248	-0.0143844	-0.59395	-0.129467	0.0132453	0.491774	-0.36594	0.201651	0.967613	-0.339737	-0.649276	-0.331292	0.798417	-0.510092	0.140604	0.187827	-0.669856	-0.506221	-1.13358	-0.389854	-0.679057	0.00611189	0.172124	-0.842593	-0.479799	-0.801989
	51	-5.90307	-6.31346	-11.4924	-2.27512	-2.94725	-7.49881	-5.79217	0.809051	-5.54934	7.90427	8.30416	2.63267	4.87436	3.42861	6.27571	-0.143552	0.205754	-0.647551	-0.0522401	0.36686	-0.166427	0.135272	0.0409841	-0.0439457	-0.691598	0.108007	-0.48106	0.0559613	-0.401771	-0.154015	0.513634	-0.0434621	-0.825872	-0.215336	0.796927	-0.416469	-0.447369	0.142525	-0.286213	0.0732551	-1.15431	-0.39816	-0.49604	-0.0626461	-0.336294	-1.04952	-0.148493	-0.5879
	51.5	-5.66414	-5.37844	-11.18	-1.70227	-2.78136	-6.51898	-6.0435	1.10606	-6.22167	8.22029	8.10751	2.90125	4.66468	3.52245	6.2972	0.300841	-0.178262	-0.578087	-0.175426	0.227897	-0.25379	-0.0529533	0.0751468	-0.152172	-0.363564	-0.180796	-0.544657	-0.314692	-0.129436	-0.183963	0.277596	0.360632	-0.560399	-0.220852	0.631035	-0.0404893	-0.867525	0.559048	-0.16014	0.338852	-0.903048	-0.0774432	-0.0725204	-0.023395	-1.03785	-0.988697	0.0130629	-0.374677
	52	-5.12675	-4.66368	-10.8064	-1.14979	-2.15881	-6.30754	-5.88874	0.956565	-7.04315	8.10012	7.93684	3.25234	5.20179	3.83997	6.30332	0.354739	-0.328522	-0.454171	-0.152061	-0.258137	-0.350148	0.0591132	-0.120622	-0.111399	-0.388566	-0.89195	-0.78722	-0.300376	-0.407745	-0.462862	-0.0230396	0.419282	-0.0942899	-0.216825	0.402854	-0.195096	-0.842092	0.36598	-0.483058	-0.0430338	-0.387366	-0.0696648	0.252445	-0.319798	-1.04033	-0.407189	-0.0206256	-0.567025
	52.5	-4.53359	-4.18886	-10.3172	-0.712956	-1.60678	-5.55416	-5.26806	1.09783	-7.83611	8.19457	7.72467	3.56026	5.50669	3.93617	6.36185	0.259481	-0.293474	-0.551297	0.0571484	-0.528929	0.0109984	-0.121424	-0.289446	-0.213385	-0.464221	-0.756929	-1.06503	-0.48477	-0.501216	-0.632538	-0.787494	0.056174	-0.116999	-0.134171	-0.141887	-0.0603545	-0.924673	-0.302499	-0.466031	-0.138317	-0.0696136	-0.209162	0.0568926	-0.681934	-1.12125	-0.331972	0.239348	-0.539884
	53	-4.1739	-4.00357	-10.1572	-0.83811	-1.47317	-4.78843	-5.16563	1.32989	-8.36791	8.18569	7.96568	3.91243	5.30307	4.14354	5.91728	0.427887	-0.202458	-0.609907	-0.125726	-0.853579	0.170115	-0.434069	-0.256991	-0.30185	-0.270062	-0.475868	-0.71782	-0.69323	-0.123326	-0.48895	-1.04705	-0.310841	0.0611713	-0.173981	-0.457973	0.308126	-0.824216	-0.373512	0.0189062	0.00996818	0.0919711	-0.159694	-0.228792	-0.661695	-0.993523	-0.133192	0.272043	-0.0524566
	53.5	-3.60601	-4.14197	-9.90463	-0.99801	-1.12575	-4.9354	-5.21666	1.32976	-8.4895	8.12658	8.43592	4.69702	5.57913	4.18768	5.69856	0.218811	-0.17496	-0.436924	-0.234271	-1.09465	-0.195581	-0.402032	-0.2676	-0.390959	-0.153293	-1.01028	-0.532255	-0.312816	-0.293377	-0.360343	-1.24188	-0.36216	0.56882	-0.31645	-0.461028	0.0519371	-0.315152	-0.473968	-0.103154	-0.141887	0.24796	-0.358827	-0.384751	-0.667883	-0.464781	0.205532	-0.0919592	0.54213
	54	-3.10307	-3.909	-9.49027	-0.496837	-0.596448	-4.39684	-4.72179	1.3791	-8.20827	8.29412	8.51884	5.5564	5.89284	4.32291	5.94968	-0.105623	-0.617074	-0.182976	-0.296878	-1.06062	-0.223386	-0.106539	-0.220685	-0.799509	-0.362687	-0.851149	-0.703797	0.117818	-0.417637	-0.439601	-1.5231	-0.554405	0.539239	-0.489508	-0.543177	-0.111216	0.0806287	-0.782265	-0.22362	-0.169715	0.595146	-0.348526	-0.644729	-0.73173	-0.0986762	-0.0326074	-0.168148	0.620907
	54.5	-3.18788	-3.60559	-9.54904	-0.244968	-0.198431	-2.9268	-4.43087	1.66248	-8.24501	8.83487	8.41956	6.28353	5.41903	4.36189	6.21061	0.221062	-0.5439	-0.351556	-0.458073	-0.649968	-0.207999	-0.212505	-0.0495085	-1.04402	-0.235247	-0.433241	-0.329438	-0.26947	-0.204574	0.0366946	-1.08535	-0.566886	0.276004	-0.664352	-0.604103	0.187377	0.257455	-0.554246	-0.0231324	0.091628	0.321266	-0.0937121	-0.471434	-0.661788	0.0582647	-0.422663	0.0119506	0.28017
	55	-3.12535	-3.34626	-9.84617	-0.588106	0.352876	-2.14147	-4.91291	2.18189	-8.34121	9.1521	8.23566	6.98053	5.33619	4.31749	6.40224	0.442494	0.0289252	-0.459057	-0.539633	-0.280565	-0.562361	-0.487286	-0.0702046	-0.823867	-0.0255521	-0.696368	-0.182719	-0.382852	-0.389885	0.302172	-0.422262	-0.120152	0.340834	-0.814968	-0.331705	-0.0309133	0.174231	0.0642895	-0.020386	0.0964322	-0.363664	-0.0758439	-0.154964	-0.378552	-0.0333165	-0.262123	-0.0757867	0.210652
	55.5	-3.10588	-3.21949	-10.0572	-0.747026	0.828769	-1.97569	-5.3811	2.63354	-8.09578	9.3297	7.76433	7.42374	5.70182	3.97558	6.19149	-0.354444	-0.425869	-0.270838	-0.76106	-0.156882	-0.570435	-0.277059	-0.566033	-0.727982	-0.431613	-1.12075	-0.370872	0.046429	-0.673967	-0.18915	-0.0967432	0.115828	0.129075	-0.65548	-0.33161	-0.485279	-0.0765034	-0.00100488	-0.204621	-0.0836596	-0.204665	0.175659	-0.0766212	-0.289303	-0.605781	-0.421111	-0.45368	-0.352255
	56	-3.36767	-3.14199	-10.2635	-0.331247	1.06567	-1.48152	-5.53936	3.07299	-7.74223	9.37151	7.47318	7.81127	5.35955	3.80187	5.6971	-0.55962	-0.625016	-0.466589	-0.705039	-0.113152	-0.327735	-0.102095	-0.698669	-1.05495	-0.768911	-0.912823	-0.0946191	0.0598134	-0.801813	-0.504745	0.167213	0.0757681	-0.38583	-0.544476	-0.177395	-0.497426	-0.151609	-0.211425	-0.378109	-0.350338	0.0126682	0.310348	0.0212235	-0.194263	-0.808998	-0.553375	-0.702198	-1.21101
	56.5	-3.16613	-3.04788	-10.5592	-0.332355	1.20743	-1.25648	-5.85554	3.79605	-7.62418	9.49571	7.75175	8.28011	5.07282	3.79253	5.19739	-0.373646	0.153073	-0.828039	-0.328835	-0.182184	-0.158822	-0.181653	-0.760837	-0.864397	-0.628537	-0.656655	0.166908	-0.168476	-0.916941	-0.436939	0.298112	0.109355	-0.655102	-0.522461	-0.038643	-0.544226	-0.36616	-0.265891	0.0548302	-0.89377	-0.315574	-0.17217	0.0530719	-0.0265055	-0.694727	-0.180675	-0.839749	-1.12304
	57	-2.82663	-2.80894	-10.5383	-0.369639	1.15816	-1.78353	-5.93717	4.55935	-7.13991	9.37906	7.86316	8.809	5.13925	3.81331	4.45353	-0.82227	0.218979	-0.697285	-0.336122	-0.362585	-0.154455	-0.217071	-0.775087	-0.240401	-0.716822	-0.263487	0.00618387	-0.181176	-1.03427	-0.649846	0.0151041	0.113677	-0.546886	-0.437165	-0.0644316	-0.796122	-0.76039	-0.489882	0.610615	-1.26455	-0.204786	-0.771621	-0.269868	-0.145554	-0.943784	-0.351256	-1.18636	-0.760508
	57.5	-2.8083	-2.27047	-10.5984	0.48054	0.877758	-1.95245	-5.31256	4.74118	-6.48677	9.21059	8.02095	9.7027	4.58871	3.73644	3.73777	-0.951279	-0.103855	-0.504284	-0.301558	-0.651851	-0.18371	-0.108017	-0.449886	-0.0614252	-1.01967	0.0854968	0.00146395	-0.0483696	-0.906107	-1.03636	-0.126778	-0.247988	-0.679119	-0.552131	-0.103232	-0.845632	-0.895827	-1.06221	0.377851	-1.11946	0.264778	-0.891942	-0.339515	-0.431539	-0.798796	-0.464732	-1.29461	-0.872934
	58	-2.51315	-1.61132	-10.5959	1.17327	0.698267	-1.26176	-4.59474	4.77148	-6.31931	9.42736	8.23245	10.7726	3.85543	3.74581	4.03877	-0.182616	0.239609	-0.678586	0.244483	-0.725991	-0.329052	-0.220106	-0.00415026	-0.0613919	-0.289616	0.329319	0.000352984	-0.240827	-0.662251	-0.45632	-0.487614	-0.0881863	-0.771423	-0.958629	-0.423205	-0.605017	-0.930123	-1.05773	-0.142007	-1.09475	-0.118822	-1.29115	-0.149678	-0.585328	-0.106126	0.135004	-0.754063	-0.441905
	58.5	-2.13456	-1.22618	-10.3655	0.971608	0.827345	-0.827679	-4.37213	4.57889	-6.38774	9.28941	8.03587	11.6272	4.06234	4.00927	4.20998	0.15569	0.166753	-0.257004	0.107707	-0.680781	-0.380465	-0.411918	0.141516	0.0296235	0.393874	0.526906	-0.15571	-0.472451	-0.274406	-0.138387	-0.788327	0.103178	-0.323491	-0.558022	-0.808688	-0.56231	-1.15899	-0.523298	0.0265092	-1.02017	-0.455811	-1.33093	-0.319075	-0.759049	0.0936847	0.167419	-0.180372	-0.111268
	59	-2.24448	-1.45638	-9.96988	1.24704	0.985973	-0.843731	-4.20559	3.97031	-6.60082	9.33023	7.73097	12.623	4.21723	3.85976	4.01285	0.0346087	-0.326632	0.383443	-0.574037	-0.413216	-0.56586	-0.448469	0.105619	-0.067562	0.312181	0.335922	-0.341211	-0.439169	-0.0357067	-0.432397	-0.380397	-0.220043	-0.151939	-0.00808833	-0.511556	-0.521331	-0.979487	-0.403342	-0.342289	-0.385244	-0.299841	-0.814046	-0.383832	-0.819728	0.125852	-0.255301	0.122886	-0.489947
	59.5	-2.12223	-1.57846	-9.52693	1.76732	1.04324	-0.454093	-4.22536	3.4808	-6.9119	9.72015	7.77573	13.4211	4.00286	3.55071	4.02933	-0.0514999	-0.258317	0.411162	-0.669919	-0.207541	-0.547824	-0.502454	0.0763231	-0.19349	0.262989	-0.212629	-0.497584	0.100885	-0.274294	-0.167329	-0.153706	-0.394039	-0.606498	0.373886	-0.256484	-0.40485	-0.567753	-0.339631	-1.13065	0.220148	-0.372242	-0.377306	-0.497421	-0.281442	0.515819	0.0937615	0.486404	-0.42832
	60	-1.62457	-1.6088	-9.415	1.43299	1.44533	-0.264026	-4.68625	3.17883	-7.06231	9.77922	7.66259	13.5362	4.57893	3.45711	3.8423	-0.314012	-0.28307	0.245055	-0.464104	-0.038886	-0.35396	-0.260723	0.0548967	-0.228954	0.352096	-0.62426	-0.338044	-0.0571636	-0.160423	0.245405	-0.286457	-0.242388	-0.705422	0.837503	-0.522833	-0.183906	-0.26925	0.187565	-0.702502	0.27028	-0.495647	0.0960608	-0.770312	0.192665	0.630882	0.215935	0.834868	-0.186788
	60.5	-1.34973	-1.61255	-9.2735	1.3894	2.0305	-0.588522	-5.08767	3.01463	-7.04439	9.73822	7.43745	13.4	5.15655	3.3208	3.17059	-0.502093	-0.495336	0.450869	-0.571756	0.142984	-0.36793	0.168629	-0.00338126	-0.297749	-0.248297	-0.680673	-0.249628	-0.550638	0.086613	0.026132	-0.0149781	-0.655682	-0.668854	1.12692	-0.248728	-0.0389999	0.149689	0.166723	0.0209469	0.38624	-0.318337	0.56398	-0.696558	0.391528	0.53245	-0.492405	0.693326	-0.419414
	61	-1.15207	-1.22222	-9.20335	2.12288	2.2106	-0.897103	-4.89553	3.29455	-7.14931	10.6128	7.58295	13.0198	4.79892	2.90237	2.97767	-0.575434	-0.290657	8.92581e-05	-0.254431	0.28649	-0.529338	0.307665	0.0869287	0.0757357	-0.96075	-0.741741	-0.398909	-0.525467	-0.134781	-0.0567497	0.439336	-0.912923	-1.08927	0.839392	-0.101488	0.25436	0.28288	-0.376021	-0.200527	0.720551	-0.176479	0.511466	-0.565503	0.544675	0.0200054	-0.782471	0.411907	-0.35556
	61.5	-0.711669	-0.367318	-9.93059	2.04386	2.48448	-0.853284	-4.97677	3.87777	-6.94312	10.72	7.74624	12.2532	4.28787	2.72703	2.96055	-0.595144	-0.215159	-0.647954	0.400182	0.331221	-0.530593	0.440533	0.343426	0.509383	-0.923988	-0.771437	-0.269939	-0.589584	-0.370989	0.311367	-0.234437	-0.448225	-0.839084	0.604909	-0.61299	0.318301	0.0990846	-0.216004	-0.311807	0.52809	-0.322702	0.175938	-0.835083	0.584537	-0.461808	-0.4874	0.24078	-0.17627
	62	-0.627195	-0.0350005	-10.7897	1.69941	2.84248	-0.889673	-5.51769	4.01023	-6.65281	10.4772	7.89243	11.7858	4.0503	2.68928	2.62555	-0.318674	-0.715878	-0.824399	0.233844	0.461922	-0.435607	0.551549	0.677857	0.343317	-0.663416	-0.41991	-0.125556	-1.13362	0.031616	-0.104889	-0.821318	-0.217089	-0.21125	0.212733	-1.02894	0.00434675	-0.101729	-0.474136	-0.0899007	-0.210082	-0.205698	-0.103639	-0.758178	0.050907	-0.75369	-0.489944	-0.133592	-0.464954
	62.5	-0.753885	-0.366803	-10.9339	2.13869	2.79686	-1.0313	-5.80569	4.21363	-7.03125	11.0271	8.05668	11.4315	3.56703	2.42456	2.74576	0.0348704	-1.07725	-0.7398	-0.331008	0.498072	-0.636991	0.10571	0.727138	0.0345257	-0.561623	0.052262	-0.444675	-1.23335	-0.075358	-0.434737	-0.821285	-0.312186	-0.0727953	-0.196038	-1.02713	-0.0524327	-0.155391	-1.3302	-0.657042	-0.796387	0.0865821	-0.802089	-0.632021	-0.678748	-0.850266	-0.56729	-0.966764	-0.495171
	63	-0.898122	-0.529601	-11.6906	2.20911	2.77591	-1.53895	-5.95902	4.21255	-7.60143	11.0396	8.28145	11.1999	3.16335	2.19513	2.94018	-0.273235	-1.15677	-0.787975	-0.26769	0.0470916	-0.717366	-0.63594	0.508927	-0.241112	-0.245845	-0.153567	-0.567429	-0.741427	-0.329815	-0.463703	-1.02546	-0.441174	0.295627	-0.0800565	-1.07594	-0.183493	-0.273436	-1.28336	-1.34878	-0.989044	0.0706057	-1.28169	-1.26232	-0.768251	-0.993043	-0.288267	-1.40126	-0.550894
	63.5	-0.839527	-0.67498	-12.7823	1.88105	3.09622	-1.90497	-6.44966	3.65599	-7.71683	10.0388	8.27676	11.3972	3.22023	2.15272	2.81905	-0.386081	-1.19383	-0.53498	-0.447287	-0.486526	-0.585105	-1.01052	0.0791155	-0.732344	0.162245	-0.482537	-0.426048	-0.747061	-0.353941	-0.713658	-1.40677	-0.606899	0.611415	-0.0644835	-0.938506	-0.582391	-0.209884	-1.02501	-1.30733	-1.31182	0.0484005	-1.17202	-1.42282	-0.501141	-0.559706	0.149448	-1.49642	-0.728865
	64	-0.595092	-0.792843	-12.6472	2.17557	3.00421	-2.18407	-6.69264	3.01436	-8.19109	9.65698	8.05632	11.1505	3.43886	2.18525	3.05541	-0.239338	-0.843281	-0.366916	-0.820546	-0.760785	-0.623905	-1.24785	-0.293194	-1.10009	-0.0732001	-0.508915	-0.349919	-0.792863	-0.53009	-1.14349	-0.98737	-0.745952	0.165565	-0.497738	-0.398581	-0.615862	-0.267235	-1.33909	-1.13004	-1.28326	0.230284	-1.04618	-0.863107	-0.649446	-0.0956891	0.0873086	-1.73402	-0.4964
	64.5	-0.321132	-0.65059	-12.7916	2.74639	2.82849	-2.93145	-6.3178	2.87944	-9.37925	9.48718	7.73814	10.3305	4.09007	2.12023	3.59046	-0.435009	-0.087801	-0.461586	-0.177905	-0.935277	-0.696835	-1.14885	-0.724128	-1.27861	-0.167672	-0.468699	-0.192665	-0.35958	-0.816478	-1.28639	-0.137489	-0.74	0.0552752	-0.714309	0.272771	-0.105268	-0.264216	-0.907565	-0.932431	-0.687174	-0.0437297	-0.759487	-0.559708	-0.403643	-0.220197	-0.256173	-1.95661	-0.21292
	65	-0.28665	-0.353567	-13.6416	2.66002	2.70674	-3.54068	-6.09763	2.82203	-10.1693	8.49133	7.71153	9.56036	4.58917	2.534	3.58405	-0.775527	0.320735	-0.588477	0.219882	-0.926007	-0.405802	-0.905953	-1.02622	-1.08359	0.0228675	-0.389038	-0.11264	0.105357	-0.865513	-1.14828	-0.10235	-0.578636	0.198701	-0.444158	0.648839	-0.0194068	-0.167263	-0.0567382	-0.32864	-0.172889	-0.338894	-0.189396	-0.241403	0.325176	-0.452871	-0.287818	-1.22355	-0.234002
	65.5	-0.0217891	-0.45456	-13.6207	2.69495	2.12016	-3.40143	-6.11011	2.69577	-10.3939	7.73296	7.8361	8.72459	4.91668	3.20554	3.58445	-0.700935	0.453266	-0.563232	-0.399526	-0.494229	-0.247173	-0.433668	-0.776515	-0.582455	-0.0789035	-0.196326	0.0747112	0.102989	-0.763509	-0.934363	0.0281588	0.0460742	-0.124652	-0.619234	0.668576	0.27442	-0.0988084	0.204525	0.617145	0.274454	-0.103857	0.0162005	0.471806	0.0819487	-0.549274	-0.264053	-0.777002	0.0220084
	66	0.0856947	-0.415825	-13.5311	2.79227	1.32191	-3.40542	-5.85227	3.263	-11.4441	7.29965	8.12897	7.6356	5.46512	3.40227	3.78372	-0.67282	0.787082	-0.389484	-0.789989	-0.0288138	-0.188797	-0.00845139	-0.457879	-0.387749	-0.073826	-0.0350657	0.12064	0.175099	-0.422776	-0.436098	0.519832	0.502554	-0.196749	-0.763107	0.626729	0.680059	-0.209565	0.28204	1.0549	0.591184	-0.378939	-0.0370046	0.569586	-0.670003	-0.650941	-0.710032	-0.922231	0.00184131
	66.5	-0.428592	-0.319718	-14.3997	2.6068	0.760268	-3.92785	-5.44388	3.95667	-12.283	6.9917	8.37386	6.99086	6.13286	3.52331	3.2572	-0.614824	0.576881	-0.287594	-0.870805	0.119979	-0.0584396	0.0818537	-0.356234	-0.267276	0.317963	0.00471274	-0.135609	0.00186967	-0.146696	-0.0173324	0.566966	0.31182	-0.126153	-0.410698	0.00987953	0.659268	-0.305958	0.684641	0.982095	0.448699	-1.01682	-0.0625542	-0.0485505	-0.577801	-1.02505	-0.965935	-0.515928	-0.372807
	67	-0.655204	-0.438328	-15.0259	2.12897	0.0982899	-3.92916	-5.48243	4.13749	-11.7789	6.62185	8.27738	6.5537	6.77516	3.79256	2.71704	-0.273995	-0.0413222	0.184702	-1.19086	-0.146095	0.0483722	-0.0402007	-0.306227	0.145936	0.0943345	-0.557001	-0.441338	-0.3689	0.323748	0.605131	-0.0761962	0.166576	-0.575336	-0.329441	-0.821242	0.411735	-0.127229	0.490343	0.998171	0.152988	-0.989307	-0.212153	-0.341699	-0.524951	-1.16061	-0.60735	0.126384	-0.255613
	67.5	-0.416098	-0.411278	-14.9295	1.98824	-0.350674	-4.16997	-5.54265	4.18647	-11.5469	6.2352	7.77367	6.15608	7.65111	3.33863	2.73135	0.0651808	-0.055287	0.45115	-1.11146	-0.337265	-0.183369	-0.139729	-0.228905	0.293693	-0.124199	-0.921853	-0.671374	-0.530393	0.998678	0.447043	0.00187621	-0.132065	-1.02318	-0.578561	-1.08668	0.142143	-0.0832907	0.0370501	0.508417	0.0980967	-0.981969	-0.112518	-0.457265	-0.583266	-0.9004	-0.569736	0.106497	-0.226052
	68	-0.262334	-0.23027	-15.2474	1.87855	-0.25498	-5.13592	-5.16922	4.28524	-11.8798	6.33708	7.33865	5.82483	8.47675	2.44215	2.67708	0.488316	0.0311298	0.384324	-0.649093	-0.442237	-0.239882	-0.237105	-0.636503	0.0245311	-0.0165497	-0.770049	-1.0532	-0.451962	0.656866	-0.162262	0.305534	-0.661144	-1.2512	-0.573555	-0.972007	-0.58236	-0.221544	-0.0385783	-0.753192	-0.212602	-1.24967	0.0681468	-0.889477	-0.26838	-0.636173	-0.690041	0.412816	-0.417002
	68.5	-0.122494	-0.119049	-15.93	1.52279	0.149354	-5.41064	-4.81849	3.81373	-11.3143	6.9066	6.87163	5.19919	9.17216	2.48799	2.49989	0.664542	-0.539828	0.0705983	-0.198277	-0.552605	-0.341279	-0.376389	-0.810319	-0.0199814	-0.513315	-0.74219	-1.16943	-0.210002	0.092324	-0.315914	-0.142846	-1.08293	-1.49842	-1.02712	-0.938189	-1.25116	-0.175138	-0.129787	-1.38155	-0.526928	-1.00854	-0.00927803	-1.04369	-0.00554048	-0.744712	-0.608951	1.1188	-0.0473097
	69	0.157371	-0.440104	-16.2659	1.5228	0.651634	-4.93799	-4.86428	3.09331	-11.0416	6.7862	6.25034	4.53241	9.75637	2.51483	2.78711	0.312726	-0.815863	0.151039	-0.0542738	-0.694615	-0.694449	-0.818555	-0.338111	-0.0322839	-0.959301	-0.600671	-1.06452	0.267183	0.212261	-0.361432	-0.312658	-1.20256	-1.37552	-1.7744	-0.836618	-1.205	0.00835392	-0.461623	-1.47988	-0.403271	-0.412212	-0.0630447	-0.277308	0.0271893	-0.463372	-0.622876	0.849782	0.419706
	69.5	0.251506	-0.741004	-16.424	1.68653	1.41352	-4.8196	-4.37518	2.62428	-11.8357	6.45125	6.12839	4.09038	9.52199	1.98352	3.00583	-0.0269244	-0.543384	0.153773	-0.311909	-0.576296	-0.827768	-1.19747	0.136244	-0.326419	-0.728291	0.130723	-0.875774	0.398262	-0.125184	-0.814444	0.114016	-0.891628	-0.830175	-1.82756	-0.300886	-1.05496	-0.215957	-0.307561	-1.80504	-0.35938	-0.337413	-0.111086	0.106585	-0.191298	-0.0323172	-0.653607	0.478974	0.0236151
	70	0.128249	-0.456394	-17.1747	1.62607	2.17687	-4.38075	-3.31309	2.20041	-12.2374	7.12023	6.15966	3.6531	8.78434	2.1763	2.92971	-0.164833	-0.477544	0.127959	-0.48004	-0.460969	-0.466711	-0.920261	0.164896	-0.656922	-0.797977	0.254951	-0.125359	-0.149408	-1.20672	-0.463128	0.10309	-0.426563	-0.540318	-1.72743	0.245521	-0.695418	-0.619384	-0.108445	-1.25139	-0.41597	-0.326685	-0.677441	-0.143384	-0.779424	-0.207314	-0.583846	0.175246	-0.366456
	70.5	-0.148006	-0.055147	-18.06	1.77252	2.77265	-3.68115	-2.57406	2.12931	-12.069	7.41221	5.67904	3.01739	8.45009	2.59979	2.68974	-0.661868	-0.201334	-0.127835	-0.519789	-0.368827	-0.161884	-0.862447	0.592328	-0.595225	-1.20919	0.100576	0.518246	-0.82444	-1.15219	0.169371	-0.564644	-0.237597	-0.35648	-1.68116	0.291664	0.220659	-0.844077	-0.621514	-0.207375	-0.320204	-0.239156	-1.0062	0.108955	-0.923134	-0.39793	-0.53745	-0.363625	-0.32498
	71	-0.294232	-0.327312	-18.7016	2.05557	2.99453	-3.64826	-2.27902	2.33409	-12.0976	7.00082	5.07419	2.89414	8.11184	1.83276	2.20697	-0.985156	0.265416	-0.435233	-0.630855	-0.32412	-0.123671	-0.877476	0.888884	-0.386559	-0.866041	0.143204	0.476293	-1.11525	-0.763142	-0.370734	-0.573272	-0.259225	-0.11658	-0.90947	-0.189636	0.92588	-0.972152	-0.716063	-0.0460521	0.0795829	-0.38236	-0.702233	0.355853	-0.557681	-0.451423	-0.212262	-0.747395	-0.540578
	71.5	-0.215272	-0.224687	-19.8097	1.90707	2.98169	-4.02547	-1.26827	2.72346	-12.6631	7.05942	4.93541	3.02411	7.45049	1.31276	1.94316	-0.697374	0.503927	-0.717356	-0.285999	-0.134947	0.24923	0.0593082	0.289219	-0.217012	-0.59697	-0.182472	0.482055	-1.03055	-0.988016	-0.42431	-0.439347	0.0752746	-0.0790553	0.246268	0.0373506	0.658889	-1.06912	-0.586648	0.0557473	-0.0511386	-0.3621	-0.486007	-0.577664	-0.856296	-0.540269	0.112996	-0.651008	-0.881135
	72	0.0153731	0.572356	-21.0436	1.95831	2.92359	-4.19185	0.0459316	3.15083	-12.9928	7.19077	4.55381	2.98227	7.13134	1.55542	1.67478	-0.754431	0.381923	-1.40789	0.242897	0.15105	0.0881073	0.878418	-0.31331	0.10755	-0.822166	-0.663881	0.44855	-0.890403	-0.980435	-0.0184288	-0.914958	-0.135703	-0.375136	0.753019	-0.131267	0.373104	-1.13517	-0.838218	0.262481	-0.433008	-0.111788	-0.377197	-1.25965	-0.834883	-0.449126	-0.235881	-0.59869	-0.985817
	72.5	0.18952	0.34325	-21.9955	2.1676	2.61199	-3.62745	0.276275	3.40852	-12.7945	6.58402	4.10546	3.13129	7.11208	1.29274	1.36904	-0.863028	0.333894	-1.56811	0.646958	-0.0362665	-0.537277	0.650054	-0.148238	0.461042	-0.84916	-0.734042	0.0294595	-0.296645	-0.202142	-0.399264	-1.12066	-0.30713	-0.512599	0.569927	-1.05036	0.0445814	-0.867576	-0.777468	-0.319825	-0.659218	-0.112014	0.0275156	-0.957725	-0.17981	-0.167007	-0.0382023	-0.513045	-0.637602
	73	0.204956	-0.464562	-23.222	2.13001	2.20494	-2.67598	0.0174435	3.32276	-13.228	5.94926	4.44302	3.70456	6.76971	1.23918	1.69962	-0.455124	0.080129	-1.05219	0.798379	-0.138587	-0.911104	0.354622	-0.34422	0.561566	-0.452247	-0.829858	-0.172753	0.617577	0.266704	-0.846321	-0.784681	-0.206614	-0.369814	0.369274	-1.14082	-0.905501	-0.523221	-0.156493	-0.70078	-1.14801	-0.0787837	0.18749	-0.907655	0.22328	-0.117436	0.273531	-0.552662	-0.621862
	73.5	0.119222	-0.264961	-24.3732	2.17877	2.22445	-2.12002	-0.062296	3.52028	-14.1182	5.80772	4.79008	3.93703	5.95997	1.90811	2.21459	-0.45882	-0.288484	-0.458015	0.814319	-0.0260747	-0.720739	0.053527	-0.716604	0.513494	-0.247235	-0.815608	0.0937527	0.63903	0.0843073	-0.435445	-1.10026	0.107259	-0.334381	0.0433586	-0.369851	-1.61779	-0.381539	-0.178444	-0.480869	-1.74218	0.256677	-0.262216	-0.838724	0.0665829	0.0590681	0.0486172	-0.767286	-0.783204
	74	-0.142084	-0.0609984	-24.8424	2.1896	2.23811	-1.52862	-1.14475	3.7003	-13.597	5.77012	4.82534	3.96488	5.45236	1.76699	2.17495	-0.643888	-0.172962	-0.303736	0.347524	-0.210471	-0.613473	-0.645413	-0.671157	0.281885	-0.360502	-0.256718	0.203652	0.0818689	0.293407	-0.599355	-1.61188	0.152396	-0.429407	-0.46335	-0.320714	-1.29904	0.101556	-0.492158	-0.489955	-1.43621	0.172442	-0.403233	0.0546155	0.318768	0.243889	0.234955	-0.610682	-0.554127
	74.5	-0.835681	-0.747004	-25.4467	1.98706	2.11164	-1.05324	-3.2643	3.71677	-12.867	5.75012	5.40852	4.60127	5.18455	1.44764	2.17805	-0.157453	0.261762	0.193244	-0.454251	-0.495881	-0.27907	-1.18068	-0.487323	-0.128747	-0.507182	-0.193479	0.0902197	0.0731901	0.399463	-1.33993	-1.29042	-0.0286193	-0.299243	-0.585905	-0.438878	-1.0898	0.555794	-0.230039	-0.291541	-0.541506	-0.037211	-0.257483	0.725207	0.556124	0.0185718	0.711068	-0.40864	-0.161038
	75	-1.11809	-0.747477	-26.6063	1.8759	2.06952	-2.17886	-4.46365	3.85268	-13.1563	5.75801	6.11829	5.11385	4.9237	1.70173	2.38834	0.0109756	0.198594	0.360798	-0.905676	-0.203946	0.366685	-1.02228	-0.633913	-0.492478	-0.601603	-0.282664	-0.29372	0.056898	-0.0685984	-1.20305	-1.00564	-0.268942	0.246095	-0.0399676	-0.219117	-1.08783	0.344447	-0.21203	0.122969	-0.0715343	-0.0325784	-0.399403	0.565146	-0.214746	-0.188989	0.174713	-0.266704	-0.0865311
	75.5	-1.10796	7.10571e-05	-27.0483	2.0008	2.06168	-3.91531	-4.31864	4.10284	-12.9033	5.63979	5.88897	5.27045	4.52886	1.46128	2.10267	-0.55253	-0.292826	-0.0408503	-1.03817	-0.179516	0.345687	-0.468311	-0.743673	-0.707049	-0.494875	-0.00134101	-0.655463	-0.483449	-0.420231	-0.687462	-0.922961	-0.359699	0.230452	0.398863	-0.396553	-0.777487	-0.259072	-0.607611	-0.0107099	0.457096	-0.295118	-0.662625	0.426152	-1.14607	-0.129401	-0.383649	0.0677131	0.140342
	76	-1.33436	-0.060365	-27.2011	1.85214	1.75488	-5.11689	-3.62316	3.77537	-11.8717	5.16876	5.55184	5.8734	4.27213	1.25745	1.6556	-0.38789	-0.146374	-0.308791	-1.18216	-0.403688	0.00819901	0.341467	-0.65507	-0.905119	-0.424052	-0.00733175	-0.888973	-0.336011	-0.338712	-0.630029	-0.0729653	-0.377282	0.00133876	0.654436	-0.906262	-0.46953	-0.64138	-0.458816	-0.126074	0.636899	-0.652539	-0.558806	0.216055	-1.19652	-0.00824471	-0.185975	0.188453	0.386521
	76.5	-1.12648	-0.446582	-28.0123	1.9261	1.63457	-6.6557	-2.06363	3.19397	-11.0979	4.58083	5.51732	6.79105	3.84076	1.68086	1.42231	-0.140491	-0.327648	-0.106664	-0.982988	-0.188763	-0.0330841	0.837623	-0.259244	-0.954369	-0.42277	-0.328639	-1.11863	0.0485982	-0.966086	-0.566413	0.733417	-0.626007	0.150521	0.723871	-1.15714	-0.536612	-1.01614	0.00410006	0.0526816	0.24182	-0.851641	-0.373977	-0.289249	-1.40371	-0.209328	-0.678076	-0.134127	0.282179
	77	-0.723319	-0.365025	-28.2007	2.17066	1.77012	-8.03884	0.390787	2.88431	-10.1604	4.16539	4.80832	7.21633	3.42075	1.889	1.46855	-0.654702	-0.973065	-0.0776274	-0.334569	0.145444	-0.277385	0.89261	0.0710883	-0.900481	-0.0395145	0.0939208	-1.10345	-0.107611	-1.28502	0.118245	0.974981	-0.443898	0.0170115	0.686735	-0.715549	-0.564868	-1.31949	-0.0318253	-0.0515527	-0.183667	-0.977895	-0.542436	-0.731693	-1.77906	-0.285449	-1.35051	-0.339456	0.299286
	77.5	-0.57994	-0.335359	-27.0723	2.19016	2.00602	-8.13455	2.98647	2.75326	-8.91173	3.88816	3.99153	7.92195	3.11102	1.86705	1.54531	-0.749175	-0.983031	-0.434495	-0.35225	0.18989	-0.654025	0.643484	0.101807	-0.826576	0.41723	0.350448	-0.741565	-0.216416	-0.726669	0.19212	1.06155	-0.390987	-0.750286	0.521422	-0.304147	-0.504378	-0.931621	-0.203015	-0.0885668	-0.435912	-0.845166	-0.368819	-0.800549	-0.859491	-0.204014	-1.24942	-0.471553	0.0477771
	78	-0.23484	-0.635943	-26.0407	2.0391	2.07942	-7.6565	4.42822	2.43686	-7.81849	4.05881	3.86976	8.73799	2.99183	2.02433	1.52483	-0.155429	-0.432994	-0.268649	-0.357012	0.0485574	-0.226275	0.0182431	0.310532	-0.881751	0.0521126	0.177899	-0.585349	-0.18125	-0.661356	-0.169756	0.868596	-0.615842	-0.63108	0.0932685	-0.362889	-0.19703	0.191013	-0.0167446	0.0957602	-0.480558	-0.535778	0.271073	-0.774466	0.192046	-0.465708	-1.29919	-0.908749	-0.348877
	78.5	0.15384	-0.574812	-24.7497	2.26277	2.02932	-7.11752	5.06345	2.46211	-7.59787	4.61772	4.22408	9.15973	3.27884	1.77162	1.85472	0.0815965	-0.494707	-0.0980846	-0.104777	-0.0204473	-0.116171	-1.03032	0.308778	-0.858817	-0.612644	0.353414	-0.604273	-0.523394	-0.57262	-0.249456	0.263003	-0.834626	-0.216166	-0.290638	-0.114187	0.462738	0.919542	-0.116216	-0.0804656	-0.143849	-0.472393	0.355317	-0.736729	0.0938517	-0.87027	-1.66593	-0.947581	-0.715547
	79	0.245638	-0.248896	-22.4291	2.6262	2.31899	-5.78937	5.64726	3.1843	-8.6277	4.95401	4.16762	9.2706	3.77047	1.76996	2.26925	0.118053	-0.364616	-0.385269	-0.124445	-0.265826	-0.592501	-1.65094	-0.314425	-0.703685	-0.557123	0.117598	-0.345123	-0.661512	0.0939324	-0.297737	-0.10965	-0.829863	-0.560742	-0.207138	0.330715	0.553294	0.810336	-0.559646	-0.225383	-0.29201	-0.627328	-0.15368	-0.350618	0.328911	-0.619437	-1.11461	-0.77667	-1.24075
	79.5	0.748697	-0.0507652	-20.1168	2.77412	2.35057	-4.38779	5.6931	3.28069	-10.0524	5.13682	4.18534	9.23887	3.70206	1.57709	2.07087	0.32568	0.235327	-0.469017	-0.296943	-0.768394	-0.384451	-1.53641	-0.820899	-0.59744	-0.585148	-0.610319	-0.229074	-0.665312	0.396409	-0.404518	-0.662756	-0.964738	-0.472305	-0.577252	0.0468791	0.49651	0.618255	-1.02686	-0.34855	-0.826588	-0.590242	-0.123937	0.0805623	0.453328	-0.294088	-0.288495	-0.901154	-1.44497
	80	1.02512	0.197344	-18.4081	3.0779	2.27456	-3.43704	5.05297	3.31385	-11.9961	5.24685	4.46358	8.58336	3.24308	0.773398	1.70592	0.242576	0.268658	-0.263594	-0.245523	-1.16476	-0.336613	-1.38346	-0.861793	-0.501383	-0.81997	-0.84293	-0.192278	-0.938139	-0.0950701	-0.344148	-1.11596	-0.873591	0.221989	-1.3073	0.0322642	0.655204	0.0951993	-1.13577	-0.669702	-0.852588	-0.514837	-0.512054	0.044533	-0.339651	-0.320835	0.000668316	-0.860731	-1.01795
	80.5	0.774908	0.760359	-16.8148	3.34614	2.56961	-2.53635	5.27051	3.97695	-14.7548	4.94629	4.47924	7.61711	2.84789	0.615586	1.44658	0.0611272	0.0131608	-0.385038	-0.432328	-1.07319	-0.724224	-1.14902	-0.939667	-0.00802773	-0.471999	-0.928275	0.041378	-0.860396	-0.152958	-0.28268	-0.685145	-0.655614	-0.209359	-0.933124	0.176895	0.510156	-1.06148	-1.12676	-0.792898	-1.09507	-0.551103	-1.19287	0.0954099	-0.770326	-0.0993647	0.704531	-0.102694	-0.867422
	81	0.793417	1.23049	-15.0133	3.56731	3.22809	-1.5341	6.38172	4.11415	-16.9401	4.44336	3.85408	6.59953	2.23423	0.766078	1.16401	-0.0537466	0.105483	-0.563187	-0.45689	-0.642392	-0.608697	-0.513562	-0.67727	0.277625	0.119713	-1.08291	0.348209	-0.552228	-0.132854	-0.11052	-0.647901	-0.704496	-0.733124	-0.479569	-0.127859	-0.0853707	-1.57103	-1.18957	-0.541568	-1.57399	-0.346752	-0.863983	0.249284	-0.397125	0.125736	1.05901	0.149207	-0.4659
	81.5	1.02341	1.72447	-13.342	3.34985	3.32192	-0.766117	7.02661	3.5874	-17.8782	3.93536	3.41267	5.67712	1.76587	0.392245	1.06401	-0.240736	0.0353127	-0.39719	-0.372387	-0.552497	-0.10757	-0.0357768	-0.089155	0.038758	0.379306	-0.641044	0.0125708	-0.628973	-0.122415	0.0355025	-1.11958	-0.65767	0.00823371	-0.909693	-0.418804	-0.204622	-1.42172	-0.773798	-0.558918	-1.10079	0.250616	-0.305676	-0.313196	-0.192563	-0.104809	0.338354	-0.0441904	0.354323
	82	1.1786	2.40496	-11.989	3.17783	3.5736	-0.275575	7.62098	3.67948	-18.3058	3.39044	3.32757	4.94299	1.96589	0.78905	1.17591	-0.123846	-0.527184	-0.382069	-0.457127	-0.325799	-0.00604244	-0.0773111	-0.059083	0.0235042	0.53498	-0.307056	-0.454592	-0.568473	0.0478037	0.0391473	-0.802527	-0.394601	0.0690314	-0.501821	-0.637582	-0.21817	-1.093	-0.0741694	-0.671859	-0.541798	0.508926	-0.396019	-0.599536	0.119022	-0.178314	-0.26802	-0.00897349	0.394756
	82.5	1.54877	2.59202	-10.3592	2.9929	3.88005	-0.342316	7.8944	3.47157	-17.8487	3.18908	2.79686	4.56566	2.36569	1.77798	1.29822	0.15015	-1.04121	-0.251947	-0.212369	0.0166883	0.0245228	-0.0847285	-0.611443	0.00851648	0.471442	-0.328527	-0.793843	-0.229867	0.00974622	0.183744	-0.485623	-0.624341	-0.542253	0.384449	-1.29076	-0.160458	-0.493172	-0.0613746	-0.594434	-0.455751	0.242425	-0.116014	-0.357967	0.520254	-0.0561873	-0.33495	-0.317248	-0.138382
	83	2.52998	2.487	-8.48626	2.64716	3.7829	-0.84494	7.13559	2.71253	-16.4048	2.97017	2.51501	4.84202	2.86467	2.03608	1.24741	-0.0572856	-1.21664	0.146277	-0.199327	-0.478793	0.0731467	0.213759	-1.09771	-0.42948	0.414675	-0.594879	-1.54526	-0.177673	-0.0300506	0.297988	-0.89429	-0.63018	-0.153944	0.0972458	-1.46929	-0.000353549	0.3219	-0.17701	-0.589265	0.029706	0.0627063	0.256795	-0.508235	0.241235	0.417818	-0.715112	-1.13947	-0.273245
	83.5	3.6027	2.55577	-7.00833	2.28528	3.13788	-2.03122	4.98622	2.53621	-15.067	3.30561	2.12442	5.54533	2.84628	2.06589	1.28072	-0.687231	-2.01577	0.604562	-0.224265	-1.51756	-0.543971	0.16029	-2.00171	-0.686436	-0.0850372	-0.684512	-1.9	-0.494905	-1.14475	-0.0197531	-0.726816	-1.19378	0.214154	-0.56045	-1.61543	-0.0103439	0.89278	-1.04641	-0.511105	1.19971	-0.0421219	-0.216147	-1.05131	-0.380126	0.670553	-0.342829	-1.34926	-0.701117
	84	4.12571	2.33021	-6.09623	2.15453	2.86931	-3.12946	3.78149	2.44951	-14.2172	3.64558	1.96412	5.95242	2.85555	2.41522	1.03991	-0.758835	-2.59192	0.894488	-0.21524	-1.80306	-0.866209	0.0590783	-2.74948	-0.533715	-0.557542	-0.928327	-1.92138	-0.537034	-1.85944	-0.130868	-0.411787	-1.65592	-0.336718	-0.345941	-1.99039	0.25263	1.09117	-1.83269	-0.55144	1.49059	-0.502393	-0.325171	-0.952339	-0.880036	0.816327	0.28395	-1.38311	-1.33736
	84.5	5.33368	2.38111	-5.2392	2.29268	2.02928	-5.43081	1.06781	2.72126	-14.6781	5.35356	0.932045	7.48551	1.86091	2.08776	1.32138	-1.89571	-3.99158	1.58013	0.285201	-2.98907	-2.31993	-0.196375	-3.83764	-0.575058	-1.87056	-0.549856	-1.21185	-1.25343	-4.55153	-0.871156	-0.390681	-3.7787	-0.352598	-1.41804	-2.48713	0.114122	1.58232	-4.68384	-0.0697107	3.18112	-0.60559	-0.668918	-1.915	-1.80124	0.537952	1.77317	-1.01114	-1.94268
	85	2.81949	1.15695	-1.92514	1.03155	0.332098	-3.34348	-0.806086	1.44129	-6.603	3.1439	-0.126748	3.96807	0.165128	0.610852	0.764025	-1.4169	-2.43076	1.03062	0.355263	-1.90954	-1.704	-0.285893	-2.03477	-0.231057	-1.48424	0.13793	-0.0739956	-1.02055	-3.30868	-0.899308	-0.176216	-2.7251	-0.0278874	-1.27634	-1.24104	-0.0912774	0.821174	-3.47105	0.213747	2.32484	-0.191606	-0.512627	-1.4595	-1.18483	-0.0537037	1.50858	-0.0657475	-1.08244
[truncated: 48 more columns]

## Sheet: Run Information
File Name	WNK1_SA_PEG400_0_5_10_15_20_08062024.pcrd
Created By User	admin
Notes
ID
Run Started	08/07/2024 01:56:34 UTC
Run Ended	08/07/2024 04:05:48 UTC
Sample Vol	25
Lid Temp	105
Protocol File Name	SyproOrangeTAO2.prcl
Plate Setup File Name	Read_all_plate.pltd
Base Serial Number	CC011639
Optical Head Serial Number	785BR4300
CFX Manager Version	3.1.1517.0823.
