# Supplementary material for: Water and chloride as allosteric inhibitors in WNK kinase osmosensing
Source: eLife. 2024 Nov 25;12:RP88224. doi: 10.7554/eLife.88224 (PMC11588334; doi:10.7554/eLife.88224)
Supplement: Figure 5—figure supplement 1—source data 1. [file elife-88224-fig5-figsupp1-data1.xlsx]

## Sheet: Sheet1
Supplemental Figure 1 underlying data
Figure 5-S1A	uWNK3WT S304 Chloride
Time	50 mM Cl-	0.035017156\n \n 0.053263359\n \n 0.551891027\n \n 0.246051867\n \n 0.215320754\n \n 0.104105731	150 mM Cl-	0.174512761\n \n 0.234237009\n \n 0.767022362\n \n 0.519869389\n \n 0.507667767\n \n 0.296215712	250 mM Cl-	SD3
0	6.38199	0.0478762	6.87332	0.0193043	6.9652	0.307303
4	63.0473	0.236822	29.6458	0.900204	22.8249	3.95376
7	77.4927	0.0228205	43.2904	0.59464	35.5919	3.82623
10	85.3082	2.01564	54.2723	0.137469	42.6853	0.716096
15	92.0283	0.0876136	67.0041	0.131611	55.2008	0.591926
20	94.8999	0.0245792	75.1878	0.3034	63.9686	0.311326
Figure 5-S1B	uWNK3 E314Q S304 Chloride
Time	50 mM Cl-	150mM Cl-	250 mM Cl-
0	2.53116	2.25966	2.14289
4	45.1343	23.8028	28.0168
7	75.049	35.0303	33.7132
15	83.2559	53.5473	47.7497
20	94.655	61.6302	54.1112
**no data for 10 min time points
Figure 5-S1C	uWNK3 E314 25C S304 Chloride
Time	50 mM Cl-	150mM Cl-	250 mM Cl-
0	13.7838	12.2425	14.3271
4	68.0893	59.8385	42.9929
7	77.3714	60.8418	56.519
10	83.2077	67.4523	63.9067
15	89.0982	75.2697	71.4919
20	92.0058	80.1712	73.4516
Figure 5-S1D	uWNK3 K236A S304 Chloride
Time	50 mM Cl-	150mM Cl-	250 mM Cl-
0	3.60962	3.66054	0
4	76.3396	46.0177	23.5471
7	86.0707	59.1519	43.6043
10	92.1373	69.2125	55.256
15	94.583	75.5376	66.0869
20	94.8179	82.8052	70.4312
Figure 5-S1E	uWNK3 K307A S304 Chloride
Time	50 mM Cl-	150 mM Cl-	250 mM Cl-
0	2.33645	2.09265	1.72107
4	58.4289	21.7876	12.6036
7	75.7472	43.2049	29.7105
10	86.6067	57.7543	44.165
15	93.1795	70.9172	59.5918
20	94.8511	81.2324	66.5699
Figure 5-S1F	uWNK3 M301A S304 Chloride
Time	50 mM Cl-	150mM Cl-	250 mM Cl-
0	0.126322	0	0.181017
4	4.64159	2.48586	1.53256
7	10.9519	4.17179	2.86518
10	17.2605	7.24252	4.78327
15	27.3715	12.9753	8.95943
20	34.9762	19.4277	14.2515
Figure 5-S1G	uWNK3 F346F S304 Chloride
Time	50 mM Cl-	150 mM Cl-	250 mM Cl-
0	0.660145	0.808122	0.669633
4	15.9646	3.65146	2.81787
7	33.1557	8.99409	5.4894
10	48.2398	17.5316	8.91925
15	65.9431	36.9546	19.1354
20	74.4503	47.3753	29.918
Figure 5-S1H	uWNK3 D279N S304 Chloride
Time	50 mM Cl-	SD1	150mM Cl-	SD2	250 mM Cl-	SD3
0	1.36233	1.17984	4.67968	4.8452	1.09345	1.31954
4	12.1555	1.09034	3.32582	1.01191	2.12954	0.300791
7	21.1986	0.79502	8.65155	2.35844	3.96428	0.550381
10	28.288	1.2839	14.5606	2.26574	7.26297	0.973622
15	38.7482	0.142651	23.8348	1.72598	14.9064	1.74779
20	45.636	1.01762	32.1137	1.32984	22.9294	1.89328
