# Supplementary material for: Water and chloride as allosteric inhibitors in WNK kinase osmosensing
Source: eLife. 2024 Nov 25;12:RP88224. doi: 10.7554/eLife.88224 (PMC11588334; doi:10.7554/eLife.88224)
Supplement: Figure 5—source data 1. [file elife-88224-fig5-data1.xlsx]

## Sheet: Sheet1
Figure 5 underlying data
Figure 5A	uWNK3WT Cloride
Time	50 mM Cl-	SD	150 mM Cl-	SD2	250 mM Cl-	SD3
0	0.0548181	0.0478762	0.157895	0.0193043	0.0740741	0.0643599
4	94.2497	0.236822	82.4028	0.900204	44.7741	12.2969
7	95.6109	0.0228205	92.6948	0.59464	76.8137	3.08549
10	97.2663	2.01564	94.0873	0.137469	87.2328	1.11144
15	96.3245	0.0876136	94.9208	0.131611	92.065	0.544163
20	96.5474	0.0245792	95.61	0.3034	93.7522	0.412188
Figure 5B	uWNK3 E314Q Chloride
Time	50 mM Cl-	150 mM Cl-	250 mM Cl-
0	0	0	0
4	94.0445	89.5141	79.292
7	93.8269	93.7101	86.9621
10	95.1221	93.6818	88.4291
15	96.3008	94.5885	92.4177
20	95.4122	95.413	92.6129
Figure 5C	uWNK3 E314A Chloride
Time	50 mM Cl-	150 mM Cl-	250 mM Cl-
0	0	0	0
4	97.8172	97.0034	94.9554
7	98.1502	97.8982	97.4118
10	98.3495	98.0556	97.8018
15	98.4897	98.3039	98.0495
20	98.5999	98.515	97.9512
Figure 5D	uWNK3 E314A Chloride 25C
Time	50 mM Cl-	150 mM Cl-	250 mM Cl-
0	0	0	0
4	97.5636	92.1974	80.0667
7	95.7017	97.568	94.5714
10	100	98.2529	96.685
15	98.7724	98.4189	98.0557
20	100	98.4224	98.1166
Figure 5E	uWNK1 WT Chloride data points				Figure 5E	uWNK1 WT Chloride modeled lines				Figure 5F	uWNK1 E388A Chloride datapoints				Figure 5F	uWNK1 WT Chloride modeled lines
Time	25 mM Cl-	50 mM Cl-	100 mM Cl-		Time line	25 mM Cl-	50 mM Cl-	100 mM Cl-		Time	25 mM Cl-	50 mM Cl-	100 mM Cl-		Time line	25 mM Cl- line	50 mM Cl- line	100 mM Cl- line
0	0	0	0		0	0.001	0.001	0.001		0	0.0432858	0.02889	0.0463214		0	0.001	0.001	0.0473214
5	0.041216	0.030719	0.0156523		0.6	0.00141729	0.00140274	0.00137576		5	0.103572	0.054088	0.0497768		0.6	0.00153385	0.00151737	0.047808
10	0.127247	0.0795894	0.0313916		1	0.00176838	0.00172098	0.00163836		10	0.327742	0.184463	0.0499635		1	0.00201643	0.00195968	0.048181
15	0.363219	0.142863	0.0561142		1.2	0.00196922	0.00189559	0.00177146		15	1.18969	0.399375	0.143847		1.2	0.00230457	0.00221395	0.0483805
20	0.895954	0.283808	0.0809211		1.8	0.00268849	0.00248343	0.00217294		20	2.5309	0.98135	0.245321		1.8	0.00339984	0.003126	0.0490256
30	2.66034	0.990525	0.170587		2.4	0.00361392	0.0031709	0.00257228		30	3.62282	2.8933	0.658774		2.4	0.00493514	0.00429403	0.0497333
40	3.5614	2.22753	0.372834		3	0.0047916	0.00396304	0.00296667		40	3.73807	3.5275	1.61051		3	0.00706171	0.00576403	0.0504983
60	3.76033	3.57581	1.25179		3.6	0.0062762	0.00486589	0.00335678		60	3.79325	3.73566	3.36991		3.6	0.0099766	0.00758903	0.0513198
					4.2	0.00813258	0.00588693	0.00374537							4.2	0.0139353	0.00983085	0.0522015
					4.8	0.0104376	0.0070354	0.00413628							4.8	0.0192674	0.0125621	0.05315
					5.4	0.0132824	0.00832263	0.00453375							5.4	0.0263959	0.0158686	0.0541749
					6	0.0167749	0.00976222	0.00494208							6	0.0358598	0.0198514	0.0552875
					6.6	0.0210424	0.0113702	0.00536542							6.6	0.0483408	0.0246302	0.0565013
					7.2	0.0262356	0.0131654	0.00580776							7.2	0.0646927	0.0303456	0.0578311
					7.8	0.0325313	0.0151694	0.00627288							7.8	0.0859712	0.037163	0.0592935
					8.4	0.0401373	0.0174067	0.00676442							8.4	0.113461	0.0452755	0.0609064
					9	0.0492962	0.0199055	0.00728588							9	0.148691	0.0549081	0.0626897
					9.6	0.0602899	0.0226974	0.00784073							9.6	0.193433	0.0663207	0.064665
					10.2	0.0734441	0.0258177	0.00843241							10.2	0.249653	0.0798121	0.0668562
					10.8	0.0891323	0.0293063	0.00906444							10.8	0.319425	0.0957225	0.0692892
					11.4	0.107779	0.0332076	0.00974037							11.4	0.40475	0.114436	0.0719928
					12	0.12986	0.037571	0.0104639							12	0.507311	0.136379	0.0749983
					12.6	0.155904	0.0424514	0.0112389							12.6	0.628139	0.162021	0.0783404
					13.2	0.186485	0.0479097	0.0120694							13.2	0.767259	0.19187	0.0820572
					13.8	0.222216	0.054013	0.0129597							13.8	0.923381	0.226457	0.0861903
					14.4	0.263732	0.0608356	0.0139143							14.4	1.09376	0.266331	0.0907857
					15	0.311666	0.0684588	0.014938							15	1.27432	0.312028	0.0958937
					15.6	0.366621	0.0769718	0.0160358							15.6	1.46006	0.364055	0.101569
					16.2	0.429128	0.0864722	0.0172132							16.2	1.64568	0.422846	0.107873
					16.8	0.499599	0.0970657	0.018476							16.8	1.82624	0.488733	0.11487
					17.4	0.578277	0.108867	0.0198304							17.4	1.99779	0.561902	0.122632
					18	0.665188	0.121999	0.0212828							18	2.1576	0.642356	0.131236
					18.6	0.760091	0.136594	0.0228404							18.6	2.30422	0.729883	0.140766
					19.2	0.862457	0.152792	0.0245106							19.2	2.43733	0.824041	0.151311
					19.8	0.971457	0.17074	0.0263015							19.8	2.55739	0.924157	0.162969
					20.4	1.08599	0.190593	0.0282214							20.4	2.66541	1.02935	0.175843
					21	1.20472	0.212509	0.0302796							21	2.76262	1.13856	0.19004
					21.6	1.32619	0.236652	0.0324856							21.6	2.85032	1.25062	0.205677
					22.2	1.44883	0.263184	0.0348499							22.2	2.92975	1.36433	0.222872
					22.8	1.57117	0.292265	0.0373834							22.8	3.00201	1.4785	0.241752
					23.4	1.69182	0.324051	0.0400977							23.4	3.06807	1.59202	0.262443
					24	1.8096	0.358688	0.0430054							24	3.12873	1.70393	0.285076
					24.6	1.92354	0.396305	0.0461197							24.6	3.18466	1.8134	0.30978
					25.2	2.03295	0.437014	0.0494545							25.2	3.23642	1.9198	0.336685
					25.8	2.13735	0.480904	0.0530248							25.8	3.28447	2.02267	0.365913
					26.4	2.23649	0.52803	0.0568463							26.4	3.32917	2.12168	0.397582
					27	2.33031	0.578419	0.0609359							27	3.37085	2.21664	0.431799
					27.6	2.41886	0.632054	0.0653111							27.6	3.40978	2.30748	0.468659
					28.2	2.5023	0.688881	0.0699907							28.2	3.44618	2.39419	0.508239
					28.8	2.58089	0.748801	0.0749945							28.8	3.48024	2.47684	0.550597
					29.4	2.65488	0.811669	0.0803433							29.4	3.51215	2.55553	0.595769
					30	2.72456	0.877301	0.086059							30	3.54205	2.63039	0.643765
					30.6	2.79023	0.945469	0.0921646							30.6	3.57008	2.70157	0.694567
					31.2	2.85216	1.01591	0.0986844							31.2	3.59637	2.76921	0.748126
					31.8	2.91062	1.08834	0.105644							31.8	3.62104	2.83348	0.804364
					32.4	2.96584	1.16243	0.113069							32.4	3.64418	2.89451	0.863173
					33	3.01806	1.23786	0.120988							33	3.6659	2.95248	0.924412
					33.6	3.06748	1.31429	0.12943							33.6	3.68629	3.00751	0.987914
					34.2	3.11428	1.39138	0.138424							34.2	3.70542	3.05974	1.05349
					34.8	3.15862	1.46881	0.148002							34.8	3.72339	3.10932	1.12092
					35.4	3.20067	1.54626	0.158195							35.4	3.74025	3.15637	1.18997
					36	3.24056	1.62345	0.169037							36	3.75609	3.20101	1.2604
					36.6	3.27841	1.70009	0.180562							36.6	3.77095	3.24335	1.33196
					37.2	3.31435	1.77596	0.192805							37.2	3.78491	3.28352	1.40439
					37.8	3.34847	1.85083	0.2058							37.8	3.79802	3.3216	1.47743
					38.4	3.38088	1.92452	0.219584							38.4	3.81032	3.35772	1.55082
					39	3.41166	1.99687	0.234193							39	3.82188	3.39196	1.62434
					39.6	3.44091	2.06775	0.249664							39.6	3.83273	3.42441	1.69775
					40.2	3.4687	2.13706	0.266033							40.2	3.84292	3.45517	1.77083
					40.8	3.49511	2.20471	0.283337							40.8	3.85249	3.48432	1.84338
					41.4	3.5202	2.27063	0.30161							41.4	3.86147	3.51194	1.91523
					42	3.54405	2.33478	0.320888							42	3.86991	3.53811	1.9862
					42.6	3.56671	2.39712	0.341205							42.6	3.87783	3.5629	2.05615
					43.2	3.58826	2.45765	0.362592							43.2	3.88527	3.58638	2.12495
					43.8	3.60873	2.51635	0.385081							43.8	3.89226	3.60862	2.19248
					44.4	3.62818	2.57323	0.408699							44.4	3.89882	3.62968	2.25866
					45	3.64668	2.62829	0.433472							45	3.90498	3.64963	2.3234
					45.6	3.66425	2.68156	0.459423							45.6	3.91077	3.66851	2.38664
					46.2	3.68096	2.73306	0.486572							46.2	3.9162	3.68639	2.44832
					46.8	3.69683	2.78281	0.514934							46.8	3.9213	3.70331	2.50839
					47.4	3.71192	2.83085	0.544521							47.4	3.9261	3.71933	2.56684
					48	3.72626	2.87721	0.575341							48	3.9306	3.7345	2.62364
					48.6	3.73989	2.92193	0.607397							48.6	3.93482	3.74885	2.67877
					49.2	3.75284	2.96505	0.640686							49.2	3.93879	3.76244	2.73224
					49.8	3.76515	3.00661	0.675202							49.8	3.94252	3.77529	2.78404
					50.4	3.77684	3.04664	0.710932							50.4	3.94602	3.78746	2.83418
					51	3.78796	3.0852	0.747858							51	3.9493	3.79897	2.88269
					51.6	3.79852	3.12231	0.785956							51.6	3.95239	3.80986	2.92957
					52.2	3.80856	3.15804	0.825198							52.2	3.95529	3.82017	2.97486
					52.8	3.8181	3.1924	0.865549							52.8	3.95801	3.82992	3.01856
					53.4	3.82717	3.22546	0.906969							53.4	3.96057	3.83915	3.06073
					54	3.83578	3.25725	0.949414							54	3.96297	3.84788	3.10138
					54.6	3.84397	3.2878	0.992834							54.6	3.96522	3.85614	3.14055
					55.2	3.85175	3.31717	1.03718							55.2	3.96734	3.86395	3.17827
					55.8	3.85914	3.34539	1.08238							55.8	3.96933	3.87134	3.21459
					56.4	3.86616	3.3725	1.12838							56.4	3.9712	3.87833	3.24953
					57	3.87284	3.39854	1.17512							57	3.97295	3.88494	3.28314
					57.6	3.87918	3.42355	1.22253							57.6	3.9746	3.89119	3.31545
					58.2	3.88521	3.44756	1.27054							58.2	3.97614	3.89711	3.34651
					58.8	3.89093	3.47061	1.31907							58.8	3.9776	3.9027	3.37634
					59.4	3.89637	3.49274	1.36805							59.4	3.97896	3.908	3.405
					60	3.90154	3.51397	1.41741							60	3.98024	3.913	3.43251
