# Supplementary material for: Water and chloride as allosteric inhibitors in WNK kinase osmosensing
Source: eLife. 2024 Nov 25;12:RP88224. doi: 10.7554/eLife.88224 (PMC11588334; doi:10.7554/eLife.88224)
Supplement: Figure 6—source data 1. [file elife-88224-fig6-data1.xlsx]

## Sheet: Sheet1
Figure 6 underlying data
Figure 5A	uWNK3WT Chloride
Time	50 mM Cl-	SD	150 mM Cl-	SD2	250 mM Cl-	SD3
0	0.0548181	0.0478762	0.157895	0.0193043	0.0740741	0.0643599
4	94.2497	0.236822	82.4028	0.900204	44.7741	12.2969
7	95.6109	0.0228205	92.6948	0.59464	76.8137	3.08549
10	97.2663	2.01564	94.0873	0.137469	87.2328	1.11144
15	96.3245	0.0876136	94.9208	0.131611	92.065	0.544163
20	96.5474	0.0245792	95.61	0.3034	93.7522	0.412188
Figure 5B	uWNK3 K236A Chloride
Time	50 mM Cl-	150 mM Cl-	250 mM Cl-
0	0.117775	0.113468	0
4	92.2408	83.0535	55.2281
7	93.9921	89.8028	78.4475
10	94.3206	91.5289	86.0917
15	94.8564	92.7573	89.3695
20	94.9388	92.9748	91.2525
Figure 5C	uWNK3 K2307A Chloride
Time	50 mM Cl-	150 mM Cl-	250 mM Cl-
0	0.910866	0.1044	0
4	94.2309	80.3646	47.2071
7	96.2085	92.4975	80.2397
10	96.2825	94.6422	89.4696
15	96.9271	95.8449	93.5209
20	96.7813	96.4252	94.8701
Figure 5D	uWNK3 M301A Chloride
Time	50 mM Cl-	150 mM Cl-	250 mM Cl-
0	1.08463	0.992617	1.10074
4	34.3701	10.5744	5.86674
7	76.4036	20.5318	13.2911
10	91.0322	35.6517	24.4249
15	94.3283	67.0659	40.4788
20	95.9922	84.4814	55.9542
Figure 5E	uWNK3 Y346F Chloride
Time	50 mM Cl-	150 mM Cl-	250 mM Cl-
0	0.0531426	0.048865	0.0288623
4	53.7225	6.52402	3.23744
7	82.7708	18.5198	7.09557
10	90.1316	34.6127	12.6881
15	93.4431	49.6431	27.1311
20	94.8457	72.0131	42.3411
Figure 5F	uWNK3 D279N Chloride
Time	50 mM Cl-	SD	150 mM Cl-	SD2	250 mM Cl-	SD3
0	0.06468	0.056338	2.53204	4.23337	0.174612	0.153952
4	74.5288	2.75677	21.8284	8.28971	7.69758	2.31995
7	87.3044	0.954513	46.0636	9.19009	14.9193	3.39867
10	90.5569	0.785116	64.9315	5.20777	25.3367	4.17047
15	92.9258	0.279438	78.6987	3.30006	45.3126	4.11486
20	93.7499	0.168697	82.2976	6.42161	61.1986	1.84389
