# Supplementary material for: Water and chloride as allosteric inhibitors in WNK kinase osmosensing
Source: eLife. 2024 Nov 25;12:RP88224. doi: 10.7554/eLife.88224 (PMC11588334; doi:10.7554/eLife.88224)
Supplement: Figure 7—source data 1. [file elife-88224-fig7-data1.xlsx]

## Sheet: Sheet1
Part A WT, E314Q, D279N, Y346F gOSR_PEG400_ADPGlo
	Raw Data (545-50)
	1	2	3	4	5	6	7	8	9	10	11	12				PEG	SD PEG	No PEG	SD NoPEG
A	151752	389	157012	380	116173	239	67674	164	108179	226	125855	166	WT		WT	141646	12826.5	100569	17221
B	280	353	371	326	327	215	208	151	193	199	263	105			E314Q	135951	4857.18	79126.7	9538.11
C	144931	303	134671	389	128252	371	98197	272	69181	256	70002	203	E314Q		D279N	96301.7	4779.82	57910.7	5762.17
D	245	320	319	320	453	302	235	195	212	201	258	157			Y346F	97007.7	2452.68	63439.3	3502.81
E	105270	232	94684	411	88951	446	46387	222	63780	188	63565	174	D279N
F	266	157	265	247	439	307	258	211	201	184	144	115
G	99792	252	92118	290	99113	356	56434	282	66888	188	66996	102	Y346F
H	127	131	149	155	150	127	201	104	107	91	119	80
	PEG400		PEG400		PEG400		NO PEG400		No PEG400		No PEG400
																PEG	SD PEG	No PEG	SD NoPEG
															WT	1.41646	0.128265	1.00569	0.17221
															E314Q	1.35951	0.0485718	0.791267	0.0953811
				PEG	SD PEG	No PEG	SD NoPEG								D279N	0.963017	0.0477982	0.579107	0.0576217
			WT	141646	12826.5	100569	17221								Y346F	0.970077	0.0245268	0.634393	0.0350281
			E314Q	135951	4857.18	79126.7	9538.11
			D279N	96301.7	4779.82	57910.7	5762.17
			Y346F	97007.7	2452.68	63439.3	3502.81
				PEG	SD PEG	No PEG	SD NoPEG
			WT	1.41646	0.128265	1.00569	0.17221
			E314Q	1.35951	0.0485718	0.791267	0.0953811
			D279N	0.963017	0.0477982	0.579107	0.0576217
			Y346F	0.970077	0.0245268	0.634393	0.0350281
Part B WT, K236A, M301A, K307A gOSR_PEG400_ADPGlo
	Raw Data (545-50)
	1	2	3	4	5	6	7	8	9	10	11	12
A	104557	253	93072	305	114605	300	126857	355	125793	235	102101	134	WT
B	158	183	258	152	311	224	344	248	315	251	238	147
C	105877	252	116040	336	99161	352	107142	268	161957	342	140740	184	K236A
D	229	223	185	199	226	201	260	283	275	235	239	89
E	68757	178	83005	250	79158	296	84165	274	92026	222	90468	150	M301A
F	156	170	252	198	234	130	247	191	207	186	193	114
G	82288	209	92419	199	67084	219	73441	198	78894	165	60919	72	K307A
H	88	126	127	113	155	130	97	86	153	107	85	45
	No-pEG400						PEG400
		WT			K236A			M301A			K307A
		No PEG400	15% PEG400		No PEG400	15% PEG400		No PEG400	15% PEG400		No PEG400	15% PEG400
		104557	126857		105877	107142		68757	84165		82288	73441
		93072	125793		116040	161957		83005	92026		92419	78894
		114605	102101		99161	140740		79158	90468		67084	60919
	Average	104078	118250		107026	136613		76973.3	88886.3		80597	71084.7
	SD	6220.65	8080.51		4906.3	15957.7		4255.62	2403.13		7362.3	5321.01
	Ave/100000	1.04078	1.1825		1.07026	1.36613		0.769733	0.888863		0.80597	0.710847
	sd/100000	0.0622065	0.0808051		0.049063	0.159577		0.0425562	0.0240313		0.073623	0.0532101
